# Supplementary material for: Characterization of a Novel Hot-Spring Cyanobacterium Leptodesmis sichuanensis sp. Nov. and Genomic Insights of Molecular Adaptations Into Its Habitat
Source: Front Microbiol. 2022 Jan 28;12:739625. doi: 10.3389/fmicb.2021.739625 (PMC8832068; doi:10.3389/fmicb.2021.739625)
Supplement: Supplementary file 2 [file Data_Sheet_2.xlsx]

## Sheet: Supplementary Table 1
Supplementary Table 1 Genome characteristics of hot-spring cyanobacterial strains used in this study
Strain	Leptodesmis sp. A121	Thermoleptolyngbya sichuanensis A183
Isolation source	Erdaoqiao, Sichuan, China	Erdaoqiao, Sichuan, China
Habitat temperature (oC)/pH	40.8/6.32	40.8/6.32
Genome size (bp)	5348817	5525100
Genome completeness (%)	99.53	98.94
Genome contamination (%)	0.94	0.94
GC content (%)	50.32	56.38
Number of CDS	5345	5166
Number of rRNA operon	2	2
Number of tRNA	45	45
Accession no.	CP075171	CP053661

## Sheet: Supplementary Table 2
Supplementary Table 2 Annotations of protein-coding sequences in Leptodesmis sp. A121 genome
Gene ID	Start position	End position	Strand	Function
LS0001	128	1237	+	hypothetical protein
LS0002	1841	1239	-	hypothetical protein
LS0003	2755	1814	-	hypothetical protein
LS0004	3280	4023	+	hypothetical protein
LS0005	4225	5349	+	AAA ATPase, central region
LS0006	5475	5759	+	hypothetical protein
LS0007	5756	6208	+	hypothetical protein
LS0008	6391	7035	+	hypothetical protein
LS0009	7120	7311	+	hypothetical protein
LS0010	7304	7645	+	hypothetical protein
LS0011	7807	8007	+	hypothetical protein
LS0012	8012	8671	+	hypothetical protein
LS0013	8696	9583	+	hypothetical protein
LS0014	9619	10947	+	hypothetical protein
LS0015	11023	11649	+	hypothetical protein
LS0016	11687	11989	+	hypothetical protein
LS0017	12099	12224	+	hypothetical protein
LS0018	12298	13038	+	hypothetical protein
LS0019	13097	13372	+	UPF0150 protein Ta0767
LS0020	13375	13599	+	hypothetical protein
LS0021	13599	13730	+	hypothetical protein
LS0022	14360	14482	+	hypothetical protein
LS0023	14507	14911	+	hypothetical protein
LS0024	15069	14920	-	hypothetical protein
LS0025	16105	15056	-	Cyanophycinase (EC 3.4.15.6)
LS0026	16508	18094	+	hypothetical protein
LS0027	18178	19185	+	hypothetical protein
LS0028	19175	19732	+	hypothetical protein
LS0029	22313	19746	-	FOG: HEAT repeat
LS0030	22502	22840	+	hypothetical protein
LS0031	24911	23082	-	hypothetical protein
LS0032	25321	25857	+	hypothetical protein
LS0033	25918	26700	+	DUF1275 domain-containing protein
LS0034	26750	27292	+	hypothetical protein
LS0035	27888	27349	-	Mobile element protein
LS0036	28542	28042	-	hypothetical protein
LS0037	28732	29211	+	FIG01149654: hypothetical protein
LS0038	29320	29976	+	hypothetical protein
LS0039	30367	30128	-	hypothetical protein
LS0040	30437	30718	+	hypothetical protein
LS0041	30996	32426	+	Xanthine permease
LS0042	32445	32564	+	hypothetical protein
LS0043	32569	33270	+	Transcriptional regulator, GntR family
LS0044	33919	33530	-	16.6 kDa small heat shock protein molecular chaperon
LS0045	33991	34296	+	Exonuclease SbcD
LS0046	34561	35190	+	hypothetical protein
LS0047	35206	36129	+	hypothetical protein
LS0048	36147	38483	+	Adenylate cyclase (EC 4.6.1.1)
LS0049	38480	39259	+	hypothetical protein
LS0050	41892	39220	-	hypothetical protein
LS0051	44906	41952	-	Putative hemagglutinin-related protein
LS0052	45279	44968	-	hypothetical protein
LS0053	45579	45439	-	hypothetical protein
LS0054	45848	45711	-	hypothetical protein
LS0055	45860	50797	+	Putative hemagglutinin-related protein
LS0056	51473	50805	-	hypothetical protein
LS0057	51978	52730	+	hypothetical protein
LS0058	52732	55284	+	Cyclic-nucleotide-regulated bacteriocin/lantibiotic efflux ABC transporter, permease/ATP-binding protein
LS0059	55355	55975	+	hypothetical protein
LS0060	56033	59314	+	hypothetical protein
LS0061	59475	61364	+	hypothetical protein
LS0062	61519	62850	+	hypothetical protein
LS0063	62856	63023	+	hypothetical protein
LS0064	63591	63100	-	16.6 kDa small heat shock protein molecular chaperon
LS0065	63781	63900	+	hypothetical protein
LS0066	64746	63949	-	hypothetical protein
LS0067	64951	66426	+	Allantoinase (EC 3.5.2.5)
LS0068	67811	66549	-	Dolichol-phosphate mannosyltransferase (EC 2.4.1.83) homolog
LS0069	68964	67969	-	Pentapeptide repeat family protein
LS0070	71206	68993	-	hypothetical protein
LS0071	72138	73175	+	Rod shape-determining protein MreB
LS0072	73282	74070	+	Rod shape-determining protein MreC
LS0073	74067	74648	+	Rod shape-determining protein MreD
LS0074	75280	74657	-	Molybdenum cofactor guanylyltransferase (EC 2.7.7.77)
LS0075	76298	75273	-	Glycosyl transferase, group 2 family
LS0076	76968	76348	-	Serine acetyltransferase (EC 2.3.1.30)
LS0077	77186	77067	-	hypothetical protein
LS0078	77208	77603	+	hypothetical protein
LS0079	79887	78412	-	Glycolate dehydrogenase (EC 1.1.99.14), subunit GlcD
LS0080	80058	80210	+	hypothetical protein
LS0081	80229	81350	+	internalin, putative
LS0082	83664	81514	-	Glycyl-tRNA synthetase beta chain (EC 6.1.1.14)
LS0083	84763	83747	-	Sulfate and thiosulfate import ATP-binding protein CysA (EC 3.6.3.25)
LS0084	85017	85259	+	hypothetical protein
LS0085	85272	85448	+	LSU ribosomal protein L32p @ LSU ribosomal protein L32p, zinc-independent
LS0086	85540	86031	+	Mini-ribonuclease III
LS0087	86066	87490	+	23S rRNA (guanosine(2251)-2'-O)-methyltransferase (EC 2.1.1.185)
LS0088	87564	87848	+	hypothetical protein
LS0089	89758	87890	-	putative secreted protein
LS0090	89827	90231	+	hypothetical protein
LS0091	90803	90297	-	hypothetical protein
LS0092	90926	92443	+	hypothetical protein
LS0093	93777	92440	-	DUF839 domain / Esterase-like domain COG4222 / Glycerophosphoryl diester phosphodiesterase (EC 3.1.4.46) periplasmic (secreted in GramPositives) / Ca2+-binding domain COG2931
LS0094	93972	93844	-	hypothetical protein
LS0095	95475	94102	-	hypothetical protein
LS0096	98030	95667	-	ABC transporter, fused permease protein
LS0097	98267	98046	-	hypothetical protein
LS0098	98659	98336	-	hypothetical protein
LS0099	98910	98656	-	hypothetical protein
LS0100	99011	99742	+	hypothetical protein
LS0101	99849	101099	+	hypothetical protein
LS0102	101910	101176	-	hypothetical protein
LS0103	102333	103211	+	SAM-dependent methyltransferase
LS0104	104076	103312	-	Cell-division-associated, ABC-transporter-like signaling protein FtsE
LS0105	104217	105041	+	2-phytyl-1,4-naphtoquinone methyltransferase (EC 2.1.1.n12) @ Demethylmenaquinone methyltransferase (EC 2.1.1.163)
LS0106	105160	106389	+	Alr5253 protein
LS0107	106501	107841	+	hypothetical protein
LS0108	108240	109253	+	D-lactate dehydrogenase (EC 1.1.1.28)
LS0109	109331	110383	+	Glucokinase (EC 2.7.1.2)
LS0110	110541	112127	+	Glucose-6-phosphate isomerase (EC 5.3.1.9)
LS0111	112172	113806	+	Phosphoglucomutase (EC 5.4.2.2)
LS0112	113920	114942	+	NAD-dependent glyceraldehyde-3-phosphate dehydrogenase (EC 1.2.1.12)
LS0113	115088	116263	+	Transaldolase (EC 2.2.1.2)
LS0114	117859	116390	-	Transposase IS66 family
LS0115	118020	118865	+	hypothetical protein
LS0116	119649	119059	-	hypothetical protein
LS0117	120321	119704	-	hypothetical protein
LS0118	121628	120471	-	Ferrochelatase, protoheme ferro-lyase (EC 4.99.1.1)
LS0119	122615	121851	-	hypothetical protein
LS0120	122836	123294	+	LSU ribosomal protein L9p
LS0121	123617	124969	+	Replicative DNA helicase (DnaB) (EC 3.6.4.12)
LS0122	125033	125185	+	hypothetical protein
LS0123	125223	125570	+	hypothetical protein
LS0124	126473	125826	-	hypothetical protein
LS0125	126601	126765	+	hypothetical protein
LS0126	126766	127029	+	hypothetical protein
LS0127	128017	127331	-	hypothetical protein
LS0128	128511	128101	-	hypothetical protein
LS0129	128560	128859	+	hypothetical protein
LS0130	129239	128955	-	hypothetical protein
LS0131	129497	131185	+	Dihydroxy-acid dehydratase (EC 4.2.1.9)
LS0132	131609	131235	-	hypothetical protein
LS0133	132247	131672	-	hypothetical protein
LS0134	133397	132414	-	Malate dehydrogenase (EC 1.1.1.37)
LS0135	133740	133522	-	NAD(P)H-quinone oxidoreductase subunit O
LS0136	134892	134176	-	hypothetical protein
LS0137	135124	135855	+	hypothetical protein
LS0138	136552	135980	-	FIG027190: Putative transmembrane protein
LS0139	136763	136650	-	hypothetical protein
LS0140	137258	136773	-	Allophycocyanin-B
LS0141	137551	138060	+	Pentapeptide repeat family protein
LS0142	139881	138136	-	putative membrane protein
LS0143	140885	139896	-	hypothetical protein
LS0144	141051	142445	+	RNA methyltransferase, TrmA family
LS0145	142491	143552	+	UDP-3-O-[3-hydroxymyristoyl] glucosamine N-acyltransferase (EC 2.3.1.191)
LS0146	143723	144472	+	IMP dehydrogenase/GMP reductase
LS0147	145013	144837	-	hypothetical protein
LS0148	145423	146064	+	LSU ribosomal protein L3p (L3e)
LS0149	146151	146783	+	LSU ribosomal protein L4p (L1e)
LS0150	146776	147078	+	LSU ribosomal protein L23p (L23Ae)
LS0151	147123	147986	+	LSU ribosomal protein L2p (L8e)
LS0152	148011	148289	+	SSU ribosomal protein S19p (S15e)
LS0153	148301	148663	+	LSU ribosomal protein L22p (L17e)
LS0154	148713	149462	+	SSU ribosomal protein S3p (S3e)
LS0155	149561	149980	+	LSU ribosomal protein L16p (L10e)
LS0156	149983	150204	+	LSU ribosomal protein L29p (L35e)
LS0157	150256	150504	+	SSU ribosomal protein S17p (S11e)
LS0158	150518	150886	+	LSU ribosomal protein L14p (L23e)
LS0159	150886	151230	+	LSU ribosomal protein L24p (L26e)
LS0160	151274	151819	+	LSU ribosomal protein L5p (L11e)
LS0161	151843	152244	+	SSU ribosomal protein S8p (S15Ae)
LS0162	152316	152855	+	LSU ribosomal protein L6p (L9e)
LS0163	152859	153221	+	LSU ribosomal protein L18p (L5e)
LS0164	153234	153755	+	SSU ribosomal protein S5p (S2e)
LS0165	153838	154290	+	LSU ribosomal protein L15p (L27Ae)
LS0166	154414	155811	+	Protein translocase subunit SecY
LS0167	155811	156359	+	Adenylate kinase (EC 2.7.4.3)
LS0168	156545	156772	+	Translation initiation factor 1
LS0169	157056	157439	+	SSU ribosomal protein S13p (S18e)
LS0170	157475	157873	+	SSU ribosomal protein S11p (S14e)
LS0171	157999	158952	+	DNA-directed RNA polymerase alpha subunit (EC 2.7.7.6)
LS0172	159012	159362	+	LSU ribosomal protein L17p
LS0173	159364	160212	+	tRNA pseudouridine(38-40) synthase (EC 5.4.99.12)
LS0174	160268	160723	+	LSU ribosomal protein L13p (L13Ae)
LS0175	160723	161130	+	SSU ribosomal protein S9p (S16e)
LS0176	161204	161455	+	LSU ribosomal protein L31p @ LSU ribosomal protein L31p, zinc-independent
LS0177	161552	162664	+	Peptide chain release factor 1
LS0178	162667	163446	+	Putative RNA-binding protein YlmH
LS0179	163471	164934	+	probable chlorohydrolase
LS0180	165119	165658	+	SepF, FtsZ-interacting protein related to cell division
LS0181	166331	165921	-	hypothetical protein
LS0182	166701	167171	+	hypothetical protein
LS0183	167168	167416	+	hypothetical protein
LS0184	168043	167402	-	hypothetical protein
LS0185	168918	168040	-	hypothetical protein
LS0186	169037	169567	+	Mobile element protein
LS0187	169918	170658	+	protein of unknown function DUF45
LS0188	170658	171236	+	hypothetical protein
LS0189	171489	171965	+	Putative subunit of NAD(P)H:quinone oxidoreductase
LS0190	172144	173370	+	Light dependent period modulator LdpA
LS0191	173602	173480	-	hypothetical protein
LS0192	173604	175463	+	Putative regulatory protein, contains AAA+ NTPase domain and putative R3H ssDNA-binding domain
LS0193	176034	175588	-	Type V secretory pathway, adhesin AidA
LS0194	176206	176093	-	hypothetical protein
LS0195	176359	176264	-	Photosystem II protein PsbT
LS0196	178012	176480	-	Photosystem II CP47 protein (PsbB)
LS0197	178458	178781	+	Ferredoxin
LS0198	178877	178993	+	Photosystem II protein PsbM
LS0199	179514	179167	-	hypothetical protein
LS0200	179545	179658	+	hypothetical protein
LS0201	179838	180665	+	Photosystem II manganese-stabilizing protein (PsbO)
LS0202	181182	181967	+	Cyanobacterial SigF-related sigma factor
LS0203	182614	183480	+	Light-independent protochlorophyllide reductase iron-sulfur ATP-binding protein ChlL (EC 1.3.7.7)
LS0204	183570	184037	+	hypothetical protein
LS0205	184195	185595	+	Light-independent protochlorophyllide reductase subunit N (EC 1.3.7.7)
LS0206	187054	185696	-	hypothetical protein
LS0207	187563	188735	+	hypothetical protein
LS0208	188881	191208	+	Tyrosine-protein kinase (EC 2.7.10.2)
LS0209	191349	192623	+	Glycosyl transferase, family 2 precursor
LS0210	192736	193938	+	Glycosyltransferase
LS0211	194692	194027	-	hypothetical protein
LS0212	195229	194801	-	hypothetical protein
LS0213	195368	196078	+	Two-component transcriptional response regulator, LuxR family
LS0214	196084	198072	+	COG1649 predicted glycoside hydrolase
LS0215	198985	198077	-	FIG022979: MoxR-like ATPases
LS0216	199160	200359	+	hypothetical protein
LS0217	200417	202240	+	Efflux ABC transporter, permease/ATP-binding protein slr1149
LS0218	203019	202237	-	Efflux ABC transporter, permease protein
LS0219	203180	204289	+	FIG00557364: hypothetical protein
LS0220	205227	204322	-	Efflux ABC transporter, permease protein
LS0221	206207	205224	-	Efflux ABC transporter, ATP-binding protein
LS0222	206428	206805	+	hypothetical protein
LS0223	207662	206874	-	hypothetical protein
LS0224	207804	208553	+	Protein of unknown function DUF541
LS0225	208915	208550	-	Single-stranded DNA-binding protein
LS0226	209533	209339	-	hypothetical protein
LS0227	209765	210781	+	hypothetical protein
LS0228	211942	210860	-	Photosystem II protein D1 (PsbA)
LS0229	213263	212184	-	hypothetical protein
LS0230	213677	214480	+	hypothetical protein
LS0231	214544	215575	+	7,8-didemethyl-8-hydroxy-5-deazariboflavin synthase subunit 1
LS0232	216718	215615	-	Ferric iron ABC transporter, ATP-binding protein
LS0233	216888	218609	+	Ferric iron ABC transporter, permease protein
LS0234	218982	219617	+	Alkyl hydroperoxide reductase subunit C-like protein
LS0235	221293	219680	-	hypothetical protein
LS0236	221350	221517	+	hypothetical protein
LS0237	222304	221606	-	Uracil-DNA glycosylase, family 4 (EC 3.2.2.27)
LS0238	222415	223179	+	phosphoribosyltransferase
LS0239	223214	223522	+	hypothetical protein
LS0240	224365	223562	-	N-acetylmuramoyl-L-alanine amidase (EC 3.5.1.28)
LS0241	224444	225481	+	hypothetical protein
LS0242	225558	228050	+	Membrane protein containing HD superfamily hydrolase domain, YQFF ortholog
LS0243	228413	229174	+	Parvulin-like peptidyl-prolyl isomerase
LS0244	229264	231837	+	Cyclic-nucleotide-regulated bacteriocin/lantibiotic efflux ABC transporter, permease/ATP-binding protein
LS0245	231970	234372	+	hypothetical protein
LS0246	235064	234369	-	hypothetical protein
LS0247	235487	236512	+	Methionyl-tRNA formyltransferase (EC 2.1.2.9)
LS0248	236929	238278	+	Polysaccharide biosynthesis protein
LS0249	238312	239256	+	hypothetical protein
LS0250	239253	240194	+	hypothetical protein
LS0251	240232	241275	+	hypothetical protein
LS0252	241854	241360	-	hypothetical protein
LS0253	242092	243132	+	phosphatidylcholine desaturase
LS0254	243486	244217	+	hypothetical protein
LS0255	244256	244762	+	hypothetical protein
LS0256	246358	244832	-	hypothetical protein
LS0257	247033	246611	-	hypothetical protein
LS0258	247137	248921	+	Protease
LS0259	248918	249142	+	hypothetical protein
LS0260	249532	249215	-	hypothetical protein
LS0261	250139	253090	+	heterocyst differentiation protein
LS0262	254022	253135	-	hypothetical protein
LS0263	254444	254073	-	hypothetical protein
LS0264	258545	254469	-	hypothetical protein
LS0265	259197	259862	+	hypothetical protein
LS0266	260924	259848	-	Anthranilate phosphoribosyltransferase-like protein
LS0267	261918	260938	-	Nitrogen assimilation transcriptional activator NtcB
LS0268	262984	262115	-	hypothetical protein
LS0269	263360	265045	+	Two-component system sensor histidine kinase
LS0270	265795	265100	-	hypothetical protein
LS0271	266019	266690	+	Protein of unknown function DUF820
LS0272	266857	267765	+	hypothetical protein
LS0273	267768	267923	+	Rubredoxin
LS0274	268750	267947	-	Dienelactone hydrolase family protein
LS0275	269124	270581	+	ATP synthase beta chain (EC 3.6.3.14)
LS0276	270686	271099	+	ATP synthase epsilon chain (EC 3.6.3.14)
LS0277	272524	271280	-	Group 2 RNA polymerase sigma factor @ Cyanobacteria-specific RpoD-like sigma factor, type-7
LS0278	272627	272749	+	hypothetical protein
LS0279	274088	273111	-	Glycerol-3-phosphate dehydrogenase [NAD(P)+] (EC 1.1.1.94)
LS0280	274192	274302	+	hypothetical protein
LS0281	275373	274582	-	hypothetical protein
LS0282	275650	276093	+	hypothetical protein
LS0283	276100	277032	+	FIG00876158: hypothetical protein
LS0284	277356	278108	+	Arylesterase-like protein slr1119
LS0285	278118	278690	+	Xanthosine/inosine triphosphate pyrophosphatase
LS0286	279072	279803	+	Undecaprenyl-phosphate galactosephosphotransferase (EC 2.7.8.6)
LS0287	281174	279951	-	Uncharacterized protein (associated with DNA helicase - Rad25 homolog)
LS0288	281525	282538	+	hypothetical protein
LS0289	282668	283210	+	hypothetical protein
LS0290	283226	284068	+	UDP-glucose 4-epimerase (EC 5.1.3.2)
LS0291	284061	284261	+	hypothetical protein
LS0292	284352	284987	+	Xenobiotic acyltransferase XAT family
LS0293	284996	286189	+	Uncharacterized MFS-type transporter
LS0294	286289	287479	+	3-ketoacyl-CoA thiolase (EC 2.3.1.16) @ Acetyl-CoA acetyltransferase (EC 2.3.1.9)
LS0295	287499	288221	+	Acetoacetyl-CoA reductase (EC 1.1.1.36)
LS0296	288315	289499	+	hypothetical protein
LS0297	289553	290647	+	Polyhydroxyalkanoic acid synthase
LS0298	290868	291842	+	Ferredoxin reductase
LS0299	292093	292827	+	Nitrogenase cofactor carrier protein NafY
LS0300	293183	293785	+	hypothetical protein
LS0301	293909	294103	+	hypothetical protein
LS0302	294457	295065	+	hypothetical protein
LS0303	295068	295832	+	hypothetical protein
LS0304	296252	296028	-	Mobile element protein
LS0305	296371	296655	+	hypothetical protein
LS0306	296726	297118	+	Transposase
LS0307	297115	297609	+	Mobile element protein
LS0308	297639	298385	+	hypothetical protein
LS0309	299234	298977	-	hypothetical protein
LS0310	299327	300499	+	Mobile element protein
LS0311	300800	301300	+	hypothetical protein
LS0312	301266	301994	+	hypothetical protein
LS0313	302427	302146	-	Mobile element protein
LS0314	303076	302600	-	hypothetical protein
LS0315	303701	303177	-	NAD(P)H-plastoquinone oxidoreductase subunit J, NdhJ
LS0316	304404	303694	-	NAD(P)H-plastoquinone oxidoreductase subunit K, NdhK
LS0317	304757	304395	-	NAD(P)H-plastoquinone oxidoreductase chain 3, NdhC
LS0318	305127	305462	+	Rubredoxin
LS0319	305548	306546	+	Photosystem II stability/assembly factor HCF136/Ycf48
LS0320	306640	306888	+	Cytochrome b559 alpha chain (PsbE)
LS0321	306911	307045	+	Cytochrome b559 beta chain (PsbF)
LS0322	307054	307173	+	Photosystem II protein PsbL
LS0323	307316	307435	+	Photosystem II protein PsbJ
LS0324	307816	307688	-	Photosystem I subunit VIII (PsaI)
LS0325	308898	308038	-	Possible alpha/beta hydrolase superfamily, slr1916 homolog
LS0326	309282	311852	+	Glycogen phosphorylase (EC 2.4.1.1)
LS0327	311864	312502	+	Alpha-ribazole-5'-phosphate phosphatase (EC 3.1.3.73)
LS0328	312646	313572	+	Deacetylases, including yeast histone deacetylase and acetoin utilization protein
LS0329	313662	315626	+	Acetyl-CoA synthetase (EC 6.2.1.1)
LS0330	315739	317841	+	BioD-like N-terminal domain / Phosphate acetyltransferase (EC 2.3.1.8)
LS0331	319159	318197	-	Integron integrase IntIPac
LS0332	319779	319447	-	hypothetical protein
LS0333	320087	319773	-	hypothetical protein
LS0334	320449	320081	-	hypothetical protein
LS0335	320533	320661	+	hypothetical protein
LS0336	320742	321212	+	hypothetical protein
LS0337	321397	321936	+	Mobile element protein
LS0338	322194	321949	-	hypothetical protein
LS0339	322347	322601	+	Protein of unknown function UPF0150
LS0340	322957	323568	+	hypothetical protein
LS0341	323637	324110	+	hypothetical protein
LS0342	324113	324340	+	hypothetical protein
LS0343	324885	324337	-	hypothetical protein
LS0344	325059	325442	+	hypothetical protein
LS0345	325476	325694	+	hypothetical protein
LS0346	325718	326581	+	hypothetical protein
LS0347	326578	326826	+	hypothetical protein
LS0348	326834	327112	+	hypothetical protein
LS0349	327093	327335	+	Asl2194 protein
LS0350	327582	327848	+	hypothetical protein
LS0351	327851	328108	+	hypothetical protein
LS0352	328291	328163	-	hypothetical protein
LS0353	328610	328278	-	hypothetical protein
LS0354	328852	328604	-	hypothetical protein
LS0355	328889	329332	+	hypothetical protein
LS0356	329345	333415	+	hypothetical protein
LS0357	333419	333697	+	hypothetical protein
LS0358	333694	334167	+	hypothetical protein
LS0359	334800	334549	-	hypothetical protein
LS0360	335678	334869	-	hypothetical protein
LS0361	336269	335739	-	hypothetical protein
LS0362	336565	336266	-	hypothetical protein
LS0363	336798	336562	-	Flagellar motor switch protein FliG
LS0364	337712	337023	-	hypothetical protein
LS0365	338110	337742	-	hypothetical protein
LS0366	338669	338100	-	hypothetical protein
LS0367	338919	338680	-	hypothetical protein
LS0368	339327	339079	-	hypothetical protein
LS0369	340427	339600	-	hypothetical protein
LS0370	340660	340430	-	hypothetical protein
LS0371	341121	340663	-	hypothetical protein
LS0372	341929	341102	-	hypothetical protein
LS0373	342162	341926	-	Flagellar motor switch protein FliG
LS0374	343275	342190	-	hypothetical protein
LS0375	344232	343504	-	hypothetical protein
LS0376	344698	344198	-	hypothetical protein
LS0377	345116	345367	+	hypothetical protein
LS0378	345364	345852	+	hypothetical protein
LS0379	347012	346122	-	hypothetical protein
LS0380	348082	347042	-	Mobile element protein
LS0381	348240	349100	+	Mrr restriction system protein
LS0382	349116	349358	+	hypothetical protein
LS0383	349345	349797	+	hypothetical protein
LS0384	350281	349958	-	Transcriptional regulator, Xre family
LS0385	350661	350284	-	Phage protein
LS0386	350920	351240	+	hypothetical protein
LS0387	351244	355746	+	hypothetical protein
LS0388	355776	356015	+	hypothetical protein
LS0389	356012	356500	+	hypothetical protein
LS0390	356888	358198	+	Mobile element protein
LS0391	358285	358560	+	hypothetical protein
LS0392	358580	358801	+	hypothetical protein
LS0393	358806	359417	+	hypothetical protein
LS0394	359881	359510	-	Transposase, wcw_0483 family
LS0395	360097	359930	-	hypothetical protein
LS0396	360318	360127	-	hypothetical protein
LS0397	360866	360339	-	Photosystem I assembly related protein Ycf37
LS0398	362077	361049	-	hypothetical protein
LS0399	362149	363348	+	HtrA protease/chaperone protein
LS0400	364806	363469	-	Membrane protein PxcA, involved in light-induced proton extrusion
LS0401	365025	364894	-	hypothetical protein
LS0402	365098	367086	+	Hypothetical cyanobacterial membrane protein, in cluster with PxcA
LS0403	367242	367499	+	hypothetical protein
LS0404	368683	367568	-	hypothetical protein
LS0405	369040	369543	+	FIG00569409: hypothetical protein
LS0406	369671	369991	+	hypothetical protein
LS0407	371809	370091	-	Small GTP-binding protein domain
LS0408	373081	372368	-	hypothetical protein
LS0409	374711	373305	-	BarH
LS0410	375741	375022	-	Heme oxygenase (EC 1.14.99.3)
LS0411	376339	375998	-	NAD(P)H-plastoquinone oxidoreductase subunit M, NdhM
LS0412	376780	376469	-	hypothetical protein
LS0413	377020	377343	+	Changed start to match that seen in other orgs.
LS0414	377358	378281	+	Possible alpha/beta hydrolase superfamily, sll0553 homolog
LS0415	378848	378318	-	hypothetical protein
LS0416	379092	379502	+	hypothetical protein
LS0417	380668	379610	-	N-acetyl-gamma-glutamyl-phosphate reductase (EC 1.2.1.38)
LS0418	380824	382530	+	3,4-dihydroxy-2-butanone 4-phosphate synthase (EC 4.1.99.12) / GTP cyclohydrolase II (EC 3.5.4.25) / C-terminal extension specific for cyanobacteria
LS0419	382896	382594	-	hypothetical protein
LS0420	383089	382904	-	hypothetical protein
LS0421	384539	383211	-	TldE protein, part of TldE/TldD proteolytic complex
LS0422	385456	384596	-	hypothetical protein
LS0423	385581	385721	+	hypothetical protein
LS0424	385728	387308	+	Hypothetical with similarity to BchE, but NOT Mg-protoporphyrin monomethyl ester cyclase (anaerobic)
LS0425	388408	387503	-	SSU ribosomal protein S1p
LS0426	388628	390595	+	Chaperone protein DnaK
LS0427	390968	390810	-	hypothetical protein
LS0428	391093	394161	+	Maltose phosphorylase (EC 2.4.1.8) / Trehalose phosphorylase (EC 2.4.1.64)
LS0429	394164	395573	+	hypothetical protein
LS0430	396660	395584	-	hypothetical protein
LS0431	398117	396840	-	2-amino-3-ketobutyrate coenzyme A ligase (EC 2.3.1.29)
LS0432	398256	398131	-	hypothetical protein
LS0433	399457	398333	-	hypothetical protein
LS0434	400184	399534	-	hypothetical protein
LS0435	400352	400236	-	hypothetical protein
LS0436	400373	402106	+	Bis-ABC ATPase YheS
LS0437	402238	402948	+	hypothetical protein
LS0438	403228	404826	+	2,3-bisphosphoglycerate-independent phosphoglycerate mutase (EC 5.4.2.12)
LS0439	404972	405205	+	Protein translocase membrane subunit SecG
LS0440	405235	406131	+	hypothetical protein
LS0441	407541	406213	-	Dihydroorotase (EC 3.5.2.3)
LS0442	407587	408207	+	Signal peptidase I (EC 3.4.21.89)
LS0443	408339	408208	-	hypothetical protein
LS0444	408785	408336	-	Ferredoxin, 2Fe-2S
LS0445	412965	408976	-	DNA-directed RNA polymerase beta' subunit, cyanobacterial form (EC 2.7.7.6)
LS0446	414943	413069	-	DNA-directed RNA polymerase gamma subunit (EC 2.7.7.6)
LS0447	418335	415024	-	DNA-directed RNA polymerase beta subunit (EC 2.7.7.6)
LS0448	418695	418546	-	hypothetical protein
LS0449	418944	418819	-	hypothetical protein
LS0450	419764	418970	-	Uncharacterized metal-dependent hydrolase YcfH
LS0451	420081	419776	-	SSU ribosomal protein S20p
LS0452	420377	421687	+	Histidinol dehydrogenase (EC 1.1.1.23)
LS0453	422041	421655	-	FIG00875780: hypothetical protein
LS0454	423282	422119	-	Holliday junction ATP-dependent DNA helicase RuvB (EC 3.6.4.12)
LS0455	423352	423900	+	hypothetical protein
LS0456	424329	424883	+	DNA protection during starvation protein
LS0457	425045	425908	+	Sirohydrochlorin cobaltochelatase (EC 4.99.1.3)
LS0458	425966	426727	+	Uroporphyrinogen-III methyltransferase (EC 2.1.1.107)
LS0459	427203	426847	-	hypothetical protein
LS0460	427307	427681	+	hypothetical protein
LS0461	428256	428089	-	hypothetical protein
LS0462	430714	428294	-	sucrose synthase
LS0463	432081	430987	-	hypothetical protein
LS0464	432263	433348	+	UDP-glucose:tetrahydrobiopterin glucosyltransferase [EC:2.4.1.-]
LS0465	433361	435127	+	Isopentenyl-diphosphate Delta-isomerase (EC 5.3.3.2)
LS0466	435265	437238	+	Prolyl oligopeptidase family protein
LS0467	437854	437549	-	hypothetical protein
LS0468	438548	437874	-	ABC-type antimicrobial peptide transport system, ATPase component
LS0469	439824	438559	-	ABC-type antimicrobial peptide transport system, permease component
LS0470	441176	439836	-	HlyD family secretion protein
LS0471	442811	441576	-	L,L-diaminopimelate aminotransferase (EC 2.6.1.83)
LS0472	443105	443284	+	hypothetical protein
LS0473	443294	443689	+	Possible Helix-turn-helix domain of resolvase
LS0474	444901	443819	-	Fructose-bisphosphate aldolase class II (EC 4.1.2.13)
LS0475	448295	445194	-	Phosphoenolpyruvate carboxylase (EC 4.1.1.31)
LS0476	448645	448406	-	hypothetical protein
LS0477	448825	448649	-	hypothetical protein
LS0478	448948	452181	+	hypothetical protein
LS0479	452254	453879	+	Neurosporene C-3',4' desaturase
LS0480	454274	453924	-	Histidine triad nucleotide-binding protein 1 (HINT1)
LS0481	457435	454358	-	ATP/ADP translocase
LS0482	458117	457590	-	Translation initiation factor 3
LS0483	458468	459442	+	Possible alpha/beta hydrolase superfamily, slr1827 homolog
LS0484	460765	459482	-	hypothetical protein
LS0485	461233	461069	-	hypothetical protein
LS0486	461256	462137	+	Uncharacterized protein, YkwD family
LS0487	463497	462151	-	putative anion permease
LS0488	464051	464602	+	hypothetical protein
LS0489	464915	465082	+	hypothetical protein
LS0490	465561	465169	-	Mannose-6-phosphate isomerase (EC 5.3.1.8)
LS0491	466330	465647	-	hypothetical protein
LS0492	467393	466497	-	hypothetical protein
LS0493	469362	467515	-	Prolyl-tRNA synthetase (EC 6.1.1.15), bacterial type
LS0494	470894	469446	-	Serine/threonine kinase
LS0495	471184	471071	-	hypothetical protein
LS0496	472521	471355	-	Uncharacterized MFS-type transporter
LS0497	472802	472593	-	Molybdate-binding domain of ModE
LS0498	472966	473781	+	Molybdenum ABC transporter, substrate-binding protein ModA
LS0499	473778	474536	+	Molybdenum ABC transporter permease protein ModB
LS0500	474583	475536	+	Molybdenum ABC transporter ATP-binding protein ModC
LS0501	475719	476858	+	Transcriptional regulator of molybdate metabolism, Xre family
LS0502	477801	477142	-	Multisubunit-sodium/proton-antiporter-like complex, protein B
LS0503	478389	477802	-	Multisubunit-sodium/proton-antiporter-like complex, protein X
LS0504	478663	478379	-	Multisubunit-sodium/proton-antiporter-like complex, protein G
LS0505	478911	478660	-	Multisubunit-sodium/proton-antiporter-like complex, protein F
LS0506	479324	478908	-	Multisubunit-sodium/proton-antiporter-like complex, protein E
LS0507	480751	479321	-	Multisubunit-sodium/proton-antiporter-like complex, protein D
LS0508	481083	480748	-	Multisubunit-sodium/proton-antiporter-like complex, protein C
LS0509	482506	481085	-	Na+/H+ antiporter Nhas3 @ Thylakoid
LS0510	484260	482590	-	Na(+)-dependent bicarbonate transporter BicA
LS0511	484811	485032	+	hypothetical protein
LS0512	485241	486248	+	hypothetical protein
LS0513	489274	486245	-	Lead, cadmium, zinc and mercury transporting ATPase (EC 3.6.3.3) (EC 3.6.3.5); Copper-translocating P-type ATPase (EC 3.6.3.4)
LS0514	489878	489288	-	hypothetical protein
LS0515	490208	489882	-	hypothetical protein
LS0516	490527	492755	+	hypothetical protein
LS0517	492911	496540	+	Glycerophosphoryl diester phosphodiesterase (EC 3.1.4.46) periplasmic (secreted in GramPositives)
LS0518	496948	496652	-	hypothetical protein
LS0519	499838	497073	-	Cation-transporting ATPase, E1-E2 family
LS0520	500465	499872	-	hypothetical protein
LS0521	501124	500528	-	Mg(2+) transport ATPase, P-type (EC 3.6.3.2)
LS0522	501773	501171	-	hypothetical protein
LS0523	502686	501808	-	hypothetical protein
LS0524	503044	502769	-	hypothetical protein
LS0525	503254	504150	+	ABC transporter, substrate-binding protein (cluster 3, basic aa/glutamine/opines)
LS0526	504147	506048	+	Two-component system sensor histidine kinase
LS0527	506362	506195	-	hypothetical protein
LS0528	507031	506429	-	hypothetical protein
LS0529	507945	507004	-	hypothetical protein
LS0530	509641	508199	-	similar to membrane protein
LS0531	510204	509638	-	Cyanobacterial protein slr0575
LS0532	510323	510607	+	hypothetical protein
LS0533	510755	510943	+	Uncharacterized protein Npun_R5760
LS0534	511148	511291	+	hypothetical protein
LS0535	511771	511316	-	hypothetical protein
LS0536	511810	511935	+	hypothetical protein
LS0537	512801	511932	-	Isochorismatase family protein
LS0538	512818	513696	+	hypothetical protein
LS0539	513693	513926	+	hypothetical protein
LS0540	514531	514004	-	hypothetical protein
LS0541	515444	514566	-	hypothetical protein
LS0542	515560	516090	+	hypothetical protein
LS0543	516087	516713	+	hypothetical protein
LS0544	516873	516989	+	hypothetical protein
LS0545	517080	518648	+	IMP cyclohydrolase (EC 3.5.4.10) / Phosphoribosylaminoimidazolecarboxamide formyltransferase (EC 2.1.2.3)
LS0546	518745	519215	+	Branched-chain amino acid permeases
LS0547	519307	522351	+	Excinuclease ABC subunit A
LS0548	523353	522466	-	Glycyl-tRNA synthetase alpha chain (EC 6.1.1.14)
LS0549	523389	523529	+	hypothetical protein
LS0550	524595	523753	-	Diaminopimelate epimerase (EC 5.1.1.7)
LS0551	524687	524902	+	hypothetical protein
LS0552	527293	524963	-	Inner membrane protein, KefB/KefC family
LS0553	527484	527651	+	hypothetical protein
LS0554	528355	527675	-	Transcriptional regulator, AraC family
LS0555	528425	529942	+	hypothetical protein
LS0556	530351	529944	-	hypothetical protein
LS0557	530591	530439	-	hypothetical protein
LS0558	531282	530656	-	hypothetical protein
LS0559	531809	531279	-	hypothetical protein
LS0560	532107	531850	-	hypothetical protein
LS0561	532139	532684	+	hypothetical protein
LS0562	532735	533340	+	Transposase
LS0563	533932	534504	+	Transposase
LS0564	534886	534482	-	hypothetical protein
LS0565	535195	536667	+	hypothetical protein
LS0566	536819	536953	+	hypothetical protein
LS0567	538123	537134	-	hypothetical protein
LS0568	538294	539754	+	Arylsulfatase (EC 3.1.6.1)
LS0569	540081	540332	+	hypothetical protein
LS0570	540402	541409	+	hypothetical protein
LS0571	541423	541980	+	hypothetical protein
LS0572	542071	543342	+	Putative arylsulfatase regulatory protein
LS0573	543423	544448	+	Mobile element protein
LS0574	544498	544881	+	Sll0939 protein
LS0575	545972	544878	-	hypothetical protein
LS0576	546222	546040	-	hypothetical protein
LS0577	546308	546571	+	hypothetical protein
LS0578	546596	547537	+	hypothetical protein
LS0579	548307	547774	-	hypothetical protein
LS0580	549220	548342	-	hypothetical protein
LS0581	549336	549866	+	hypothetical protein
LS0582	549863	550489	+	hypothetical protein
LS0583	550545	550880	+	Transposase
LS0584	551696	551232	-	hypothetical protein
LS0585	551750	551878	+	hypothetical protein
LS0586	552176	552655	+	Enolase (EC 4.2.1.11)
LS0587	552775	553746	+	hypothetical protein
LS0588	554646	553762	-	hypothetical protein
LS0589	556007	555099	-	hypothetical protein
LS0590	556717	555986	-	7-cyano-7-deazaguanine synthase (EC 6.3.4.20)
LS0591	556734	558251	+	hypothetical protein
LS0592	558371	558237	-	7-cyano-7-deazaguanine synthase (EC 6.3.4.20)
LS0593	558964	558383	-	7-carboxy-7-deazaguanine synthase (EC 4.3.99.3)
LS0594	559489	558995	-	Mobile element protein
LS0595	559680	559486	-	hypothetical protein
LS0596	559855	559736	-	hypothetical protein
LS0597	560087	559836	-	Mobile element protein
LS0598	560362	560129	-	hypothetical protein
LS0599	560705	560980	+	hypothetical protein
LS0600	565373	561015	-	hypothetical protein
LS0601	565559	565437	-	hypothetical protein
LS0602	565586	566137	+	Integral membrane protein
LS0603	566163	566534	+	hypothetical protein
LS0604	566885	566538	-	hypothetical protein
LS0605	567229	566921	-	Death on curing protein, Doc toxin
LS0606	567492	567226	-	Prevent host death protein, Phd antitoxin
LS0607	567885	567658	-	hypothetical protein
LS0608	568429	567977	-	High-affinity carbon uptake protein Hat/HatR
LS0609	568461	569006	+	hypothetical protein
LS0610	569162	569662	+	Transposase
LS0611	570440	570856	+	hypothetical protein
LS0612	571215	571946	+	hypothetical protein
LS0613	572049	572183	+	hypothetical protein
LS0614	572337	574229	+	hypothetical protein
LS0615	574709	575320	+	hypothetical protein
LS0616	577050	575431	-	Uncharacterized DUF4277-domain-containing protein, perhaps a transposase
LS0617	577599	578093	+	Acetyltransferase, GNAT family
LS0618	578144	579700	+	Lycopene cyclase, CruP type
LS0619	579736	580557	+	Protein sirB1
LS0620	580671	581465	+	Circadian phase modifier
LS0621	582211	581525	-	hypothetical protein
LS0622	583097	582327	-	hypothetical protein
LS0623	583354	583181	-	hypothetical protein
LS0624	583482	584471	+	Alcohol dehydrogenase (EC 1.1.1.1)
LS0625	585000	584548	-	hypothetical protein
LS0626	585636	585238	-	Death on curing protein, Doc toxin
LS0627	585878	585633	-	Prevent host death protein, Phd antitoxin
LS0628	586120	587343	+	Geranylgeranyl diphosphate reductase (EC 1.3.1.83)
LS0629	587632	588006	+	hypothetical protein
LS0630	588410	588114	-	Exodeoxyribonuclease VII small subunit (EC 3.1.11.6)
LS0631	589735	588482	-	Exodeoxyribonuclease VII large subunit (EC 3.1.11.6)
LS0632	589941	591014	+	RecA protein
LS0633	592085	591141	-	Possible alpha/beta hydrolase superfamily, sll1129 homolog
LS0634	592158	592886	+	hypothetical protein
LS0635	593903	592983	-	Main regulator of heterocyst differentiation HetR
LS0636	594587	594369	-	hypothetical protein
LS0637	595926	594742	-	NAD(P)H-plastoquinone oxidoreductase subunit H, NdhH
LS0638	596225	596109	-	hypothetical protein
LS0639	596284	597177	+	16S rRNA (cytosine(1402)-N(4))-methyltransferase (EC 2.1.1.199)
LS0640	599726	597174	-	Cation-transporting ATPase, E1-E2 family
LS0641	600108	600314	+	hypothetical protein
LS0642	601407	600346	-	S-methyl-5-thioribose-1-phosphate isomerase (EC 5.3.1.23)
LS0643	601524	602813	+	2-polyprenyl-6-methoxyphenol hydroxylase
LS0644	602976	604157	+	Uncharacterized ferredoxin oxidoreductase MJ0100
LS0645	605342	604209	-	hypothetical protein
LS0646	605663	606208	+	hypothetical protein
LS0647	606323	607672	+	ABC transporter, RND-adapter-like protein
LS0648	607682	608899	+	ABC-type antimicrobial peptide transport system, permease component
LS0649	608904	609620	+	ABC-type antimicrobial peptide transport system, ATPase component
LS0650	610395	609715	-	hypothetical protein
LS0651	611129	610437	-	hypothetical protein
LS0652	611982	611122	-	hypothetical protein
LS0653	612264	613184	+	hypothetical protein
LS0654	613888	613265	-	Transmembrane protein PFT27
LS0655	614545	614231	-	hypothetical protein
LS0656	614622	614768	+	hypothetical protein
LS0657	614861	616387	+	Light-independent protochlorophyllide reductase subunit B (EC 1.3.7.7)
LS0658	616512	616973	+	hypothetical protein
LS0659	617528	617094	-	hypothetical protein
LS0660	617942	618142	+	hypothetical protein
LS0661	618458	620869	+	hypothetical protein
LS0662	621244	620921	-	Twin-arginine translocation protein TatB
LS0663	622113	621454	-	Phycobiliprotein lyase, HEAT subunit
LS0664	622754	622290	-	CBS domain protein
LS0665	624228	622867	-	hypothetical protein
LS0666	624428	624285	-	hypothetical protein
LS0667	625260	624460	-	Pentapeptide repeat family protein
LS0668	625388	625783	+	Glutathione S-transferase, theta (EC 2.5.1.18)
LS0669	625808	626053	+	Tryptophan-rich protein DUF2389, Ssr2843 homolog
LS0670	626383	627213	+	hypothetical protein
LS0671	627555	627232	-	ATP-dependent Clp protease adaptor protein ClpS Cyano2
LS0672	629412	627667	-	Apolipoprotein N-acyltransferase
LS0673	629544	629843	+	hypothetical protein
LS0674	630274	629924	-	hypothetical protein
LS0675	631287	630361	-	Transcriptional regulator, LysR family
LS0676	631403	631894	+	hypothetical protein
LS0677	632079	631960	-	hypothetical protein
LS0678	632690	632076	-	hypothetical protein
LS0679	633244	632687	-	Phosphopantetheine adenylyltransferase (EC 2.7.7.3)
LS0680	634041	633313	-	Candidate 1: dienelactone hydrolase
LS0681	635819	634191	-	hypothetical protein
LS0682	635951	635823	-	hypothetical protein
LS0683	636295	637860	+	putative polysaccharide export protein
LS0684	638007	638162	+	hypothetical protein
LS0685	638394	639482	+	Glycosyltransferase
LS0686	639514	641763	+	Tyrosine-protein kinase (EC 2.7.10.2)
LS0687	641901	642824	+	Putative glycosyl transferase
LS0688	642830	643657	+	O-antigen export system, permease protein
LS0689	643858	645153	+	Teichoic acid export ATP-binding protein TagH (EC 3.6.3.40)
LS0690	645161	645625	+	hypothetical protein
LS0691	645734	646528	+	hypothetical protein
LS0692	646536	647831	+	hypothetical protein
LS0693	647886	649172	+	Glycosyltransferase
LS0694	649213	650172	+	GDP-mannose 4,6-dehydratase (EC 4.2.1.47)
LS0695	650195	651277	+	hypothetical protein
LS0696	651296	652585	+	hypothetical protein
LS0697	652582	652707	+	hypothetical protein
LS0698	652912	653991	+	GDP-mannose 4,6-dehydratase (EC 4.2.1.47)
LS0699	654109	655164	+	hypothetical protein
LS0700	655235	656383	+	hypothetical protein
LS0701	656443	657594	+	hypothetical protein
LS0702	657591	658589	+	hypothetical protein
LS0703	658579	659982	+	Glucose-6-phosphate isomerase (EC 5.3.1.9)
LS0704	660021	661211	+	1,2-diacylglycerol 3-glucosyltransferase
LS0705	661221	661931	+	hypothetical protein
LS0706	661978	663165	+	Glycosyltransferase
LS0707	663373	664371	+	hypothetical protein
LS0708	664377	665645	+	Glycosyltransferase
LS0709	665672	666859	+	Glycosyltransferase
LS0710	667010	667471	+	hypothetical protein
LS0711	667488	668045	+	Glutathione S-transferase (EC 2.5.1.18)
LS0712	668216	668416	+	hypothetical protein
LS0713	670388	668436	-	hypothetical protein
LS0714	671975	670566	-	Pheophorbide a oxygenase (EC 1.14.-.-)
LS0715	672177	673067	+	hypothetical protein
LS0716	673409	673092	-	hypothetical protein
LS0717	673597	674853	+	hypothetical protein
LS0718	676372	674855	-	hypothetical protein
LS0719	676442	676939	+	Mobile element protein
LS0720	679786	677411	-	Arylsulfatase (EC 3.1.6.1)
LS0721	679901	680017	+	hypothetical protein
LS0722	680381	680172	-	hypothetical protein
LS0723	682205	680715	-	Aspartyl-tRNA(Asn) amidotransferase subunit B (EC 6.3.5.6) @ Glutamyl-tRNA(Gln) amidotransferase subunit B (EC 6.3.5.7)
LS0724	682706	682311	-	Chorismate mutase II (EC 5.4.99.5)
LS0725	682951	682787	-	hypothetical protein
LS0726	683836	682991	-	Protease IV
LS0727	684015	685079	+	Permease of the drug/metabolite transporter (DMT) superfamily
LS0728	686916	685132	-	Hemolysin activation/secretion protein
LS0729	688578	687175	-	3-isopropylmalate dehydratase large subunit (EC 4.2.1.33)
LS0730	688658	688957	+	hypothetical protein
LS0731	689099	688977	-	hypothetical protein
LS0732	689098	689682	+	hypothetical protein
LS0733	691492	690047	-	Isocitrate lyase (EC 4.1.3.1)
LS0734	693371	691728	-	Malate synthase (EC 2.3.3.9)
LS0735	693660	693776	+	hypothetical protein
LS0736	694807	694310	-	hypothetical protein
LS0737	699315	695218	-	High-affinity carbon uptake protein Hat/HatR
LS0738	699321	699497	+	hypothetical protein
LS0739	700565	699603	-	DnaJ-class molecular chaperone CbpA
LS0740	703193	700662	-	Chaperone protein DnaK
LS0741	703367	703242	-	hypothetical protein
LS0742	703486	703367	-	hypothetical protein
LS0743	704853	703525	-	hypothetical protein
LS0744	705105	704986	-	hypothetical protein
LS0745	706156	705137	-	hypothetical protein
LS0746	707403	706252	-	Aspartate aminotransferase (EC 2.6.1.1)
LS0747	708235	707420	-	Acyl-[acyl-carrier-protein]--UDP-N-acetylglucosamine O-acyltransferase (EC 2.3.1.129)
LS0748	708712	708443	-	hypothetical protein
LS0749	708965	710224	+	Transposase
LS0750	710831	710286	-	hypothetical protein
LS0751	710976	711533	+	hypothetical protein
LS0752	712097	711615	-	hypothetical protein
LS0753	712321	713007	+	Deoxyribose-phosphate aldolase (EC 4.1.2.4)
LS0754	713085	714062	+	DNA recombination and repair protein RecO
LS0755	714059	715774	+	Uncharacterized MFS-type transporter
LS0756	718476	715834	-	Cation-transporting ATPase
LS0757	718645	718505	-	hypothetical protein
LS0758	719275	718781	-	hypothetical protein
LS0759	719526	720743	+	Glycosyltransferase
LS0760	721262	723229	+	Acetyl-CoA synthetase (EC 6.2.1.1)
LS0761	723588	724121	+	hypothetical protein
LS0762	724600	725253	+	hypothetical protein
LS0763	725298	726788	+	Hemolysins and related proteins containing CBS domains
LS0764	726903	727229	+	hypothetical protein
LS0765	728214	727285	-	N-acetylmuramic acid 6-phosphate etherase (EC 4.2.1.126)
LS0766	728627	728232	-	hypothetical protein
LS0767	728729	728857	+	hypothetical protein
LS0768	728870	730945	+	Uncharacterized protein YyaL
LS0769	730982	731116	+	hypothetical protein
LS0770	731709	731359	-	hypothetical protein
LS0771	732265	731987	-	hypothetical protein
LS0772	732501	732280	-	hypothetical protein
LS0773	732852	732568	-	hypothetical protein
LS0774	733022	735046	+	Long-chain-fatty-acid--CoA ligase (EC 6.2.1.3)
LS0775	735054	735488	+	hypothetical protein
LS0776	735632	736933	+	Dihydrolipoamide acetyltransferase component of pyruvate dehydrogenase complex (EC 2.3.1.12)
LS0777	736941	737666	+	hypothetical protein
LS0778	737883	738701	+	Serine/threonine protein phosphatase (EC 3.1.3.16)
LS0779	738836	739297	+	hypothetical protein
LS0780	740831	739413	-	Glutamine synthetase type I (EC 6.3.1.2)
LS0781	741500	742009	+	Allophycocyanin beta chain
LS0782	742025	742159	+	hypothetical protein
LS0783	742212	742586	+	hypothetical protein
LS0784	743264	742713	-	Two-component transcriptional response regulator, LuxR family
LS0785	743579	744523	+	Lipoate synthase, cyanobacterial paralog
LS0786	744665	744790	+	hypothetical protein
LS0787	745051	744935	-	hypothetical protein
LS0788	746008	745142	-	Branched-chain amino acid ABC transporter, permease protein LivH (TC 3.A.1.4.1)
LS0789	746128	747051	+	Branched-chain amino acid ABC transporter, permease protein LivM (TC 3.A.1.4.1)
LS0790	748524	747160	-	Succinate-semialdehyde dehydrogenase [NAD] (EC 1.2.1.24); Succinate-semialdehyde dehydrogenase [NADP+] (EC 1.2.1.79)
LS0791	748827	748627	-	hypothetical protein
LS0792	749578	748820	-	hypothetical protein
LS0793	750049	749741	-	hypothetical protein
LS0794	750491	750177	-	hypothetical protein
LS0795	750677	750564	-	hypothetical protein
LS0796	751197	750865	-	hypothetical protein
LS0797	751575	751243	-	hypothetical protein
LS0798	751864	751986	+	hypothetical protein
LS0799	752479	752057	-	Heterocyst differentiation protein HetP
LS0800	753869	752538	-	HlyD family secretion protein
LS0801	754974	753934	-	Mobile element protein
LS0802	758504	755280	-	Cyclic-nucleotide-regulated bacteriocin/lantibiotic efflux ABC transporter, permease/ATP-binding protein
LS0803	759659	759276	-	Pterin-binding family
LS0804	759894	760445	+	hypothetical protein
LS0805	760876	761034	+	hypothetical protein
LS0806	762412	761126	-	Adenosylhomocysteinase (EC 3.3.1.1)
LS0807	762685	762554	-	hypothetical protein
LS0808	763865	762708	-	ABC exporter permease subunit of DevC family
LS0809	765041	763890	-	ABC exporter membrane fusion component of DevB family
LS0810	766055	765261	-	FIG00871248: hypothetical protein
LS0811	767827	766163	-	hypothetical protein
LS0812	767896	768669	+	Haloacid dehalogenase-like hydrolase
LS0813	768909	768646	-	hypothetical protein
LS0814	769169	772825	+	Transcription-repair coupling factor
LS0815	772850	773293	+	hypothetical protein
LS0816	773603	774910	+	hypothetical protein
LS0817	775987	774911	-	Glutamine--fructose-6-phosphate aminotransferase [isomerizing] (EC 2.6.1.16)
LS0818	778288	776048	-	UDP-glucose-beta-D-glucan glucosyltransferase
LS0819	780185	778734	-	Two-component system sensor histidine kinase
LS0820	781137	780391	-	GUN4-like protein Sll0558
LS0821	781850	781332	-	D-glycero-beta-D-manno-heptose 1-phosphate adenylyltransferase (EC 2.7.7.70) / D-glycero-beta-D-manno-heptose-7-phosphate kinase (EC 2.7.1.167)
LS0822	781979	781866	-	hypothetical protein
LS0823	782456	782647	+	Glo7428_3183-like protein
LS0824	783977	782823	-	Serine--glyoxylate aminotransferase (EC 2.6.1.45)
LS0825	784728	784153	-	hypothetical protein
LS0826	785352	784765	-	hypothetical protein
LS0827	785651	785418	-	hypothetical protein
LS0828	785823	788018	+	Lycopene cyclase, CruA type
LS0829	788143	788730	+	hypothetical protein
LS0830	788814	788930	+	hypothetical protein
LS0831	790161	788989	-	Mobile element protein
LS0832	790214	790903	+	hypothetical protein
LS0833	791346	791008	-	hypothetical protein
LS0834	791669	791352	-	hypothetical protein
LS0835	792388	791753	-	hypothetical protein
LS0836	793669	792536	-	Glycosyltransferase
LS0837	793817	794128	+	hypothetical protein
LS0838	795312	794161	-	UDP-sulfoquinovose synthase (EC 3.13.1.1)
LS0839	796781	795504	-	N-acetylornithine aminotransferase (EC 2.6.1.11)
LS0840	799013	797076	-	Serine/threonine kinase
LS0841	800163	799123	-	Predicted BioA alternative protein
LS0842	800528	800794	+	Cellulase M and related proteins
LS0843	800840	801226	+	hypothetical protein
LS0844	801431	801901	+	Ferredoxin
LS0845	801995	802114	+	unidentified open reading frame
LS0846	803005	802094	-	gamma-tocopherol methyltransferase (EC 2.1.1.95) @ delta-tocopherol methyltransferase (EC 2.1.1.95)
LS0847	803577	802993	-	hypothetical protein
LS0848	803722	805068	+	KtrAB potassium uptake system, integral membrane component KtrB
LS0849	805204	805908	+	KtrAB potassium uptake system, peripheral membrane component KtrA
LS0850	807029	806202	-	hypothetical protein
LS0851	807262	807026	-	Flagellar motor switch protein FliG
LS0852	808260	807403	-	2-hydroxy-3-oxopropionate reductase (EC 1.1.1.60)
LS0853	808353	810242	+	Uroporphyrinogen-III methyltransferase (EC 2.1.1.107) / Uroporphyrinogen-III synthase (EC 4.2.1.75)
LS0854	811582	810305	-	hypothetical protein
LS0855	811793	812716	+	Ornithine carbamoyltransferase (EC 2.1.3.3)
LS0856	812865	813473	+	SOS-response repressor and protease LexA (EC 3.4.21.88)
LS0857	814068	813598	-	hypothetical protein
LS0858	814515	814114	-	hypothetical protein
LS0859	815090	814512	-	RNA polymerase sigma factor RpoE
LS0860	815522	816616	+	Undecaprenyl-phosphate galactosephosphotransferase (EC 2.7.8.6)
LS0861	818052	816682	-	Clock-associated two-component sensor histidine kinase SasA
LS0862	819628	818351	-	hypothetical protein
LS0863	820878	819709	-	hypothetical protein
LS0864	821146	823005	+	hypothetical protein
LS0865	823850	823287	-	NADPH-dependent FMN reductase family protein
LS0866	824080	824769	+	Mg-protoporphyrin O-methyltransferase (EC 2.1.1.11)
LS0867	824932	825321	+	COG2363
LS0868	825533	827611	+	Chaperone protein HtpG
LS0869	827760	827996	+	LSU ribosomal protein L28p @ LSU ribosomal protein L28p, zinc-independent
LS0870	828086	828214	+	hypothetical protein
LS0871	828686	834037	+	hypothetical protein
LS0872	834123	834866	+	hypothetical protein
LS0873	834914	836041	+	hypothetical protein
LS0874	836063	836689	+	hypothetical protein
LS0875	836694	837029	+	hypothetical protein
LS0876	837046	837162	+	hypothetical protein
LS0877	837953	837159	-	Serine acetyltransferase (EC 2.3.1.30)
LS0878	838276	838431	+	hypothetical protein
LS0879	838492	841446	+	hypothetical protein
LS0880	841745	841401	-	Serine-protein kinase RsbW (EC 2.7.11.1)
LS0881	842170	843312	+	Serine phosphatase RsbU, regulator of sigma subunit
LS0882	843771	843430	-	hypothetical protein
LS0883	844090	845859	+	Peptidoglycan D,D-transpeptidase MrdA (EC 3.4.16.4)
LS0884	847489	845888	-	hypothetical protein
LS0885	848547	847645	-	Muramoyltetrapeptide carboxypeptidase (EC 3.4.17.13)
LS0886	850033	848564	-	hypothetical protein
LS0887	852407	850623	-	Pyruvate kinase (EC 2.7.1.40) / Phosphohistidine swiveling domain
LS0888	853855	852563	-	hypothetical protein
LS0889	854213	853860	-	Transcriptional regulator
LS0890	854884	854351	-	Biotin carboxyl carrier protein of acetyl-CoA carboxylase
LS0891	855504	854944	-	Translation elongation factor P
LS0892	856423	855584	-	hypothetical protein
LS0893	856845	858299	+	hypothetical protein
LS0894	858321	858980	+	hypothetical protein
LS0895	859099	860280	+	hypothetical protein
LS0896	860363	860926	+	hypothetical protein
LS0897	861631	860918	-	hypothetical protein
LS0898	862983	861679	-	hypothetical protein
LS0899	863158	863679	+	Photosystem I assembly related protein Ycf3
LS0900	863696	863986	+	Aspartyl-tRNA(Asn) amidotransferase subunit C (EC 6.3.5.6) @ Glutamyl-tRNA(Gln) amidotransferase subunit C (EC 6.3.5.7)
LS0901	864000	866582	+	Aminopeptidase
LS0902	866969	866598	-	hypothetical protein
LS0903	867706	867092	-	hypothetical protein
LS0904	868137	867874	-	hypothetical protein
LS0905	868183	868308	+	hypothetical protein
LS0906	868482	868904	+	hypothetical protein
LS0907	869816	868881	-	ADP-ribosylglycohydrolase family protein
LS0908	870032	872296	+	ATP-dependent DNA helicase UvrD/PcrA/Rep, cyanobacterial paralog
LS0909	872535	872323	-	hypothetical protein
LS0910	873691	872882	-	Hydrolase, alpha/beta fold family
LS0911	875103	874309	-	hypothetical protein
LS0912	875543	875229	-	hypothetical protein
LS0913	876388	875690	-	ABC exporter, ATP-binding subunit of DevA family
LS0914	876585	877382	+	3',5'-cyclic-nucleotide phosphodiesterase (EC 3.1.4.17)
LS0915	879454	877394	-	hypothetical protein
LS0916	880139	879612	-	Phycobiliprotein lyase
LS0917	881382	880246	-	hypothetical protein
LS0918	881548	881790	+	hypothetical protein
LS0919	881801	882139	+	Death on curing protein, Doc toxin
LS0920	882136	882705	+	5-formyltetrahydrofolate cyclo-ligase (EC 6.3.3.2)
LS0921	883177	882785	-	hypothetical protein
LS0922	883541	884629	+	Alanine dehydrogenase (EC 1.4.1.1)
LS0923	884960	884721	-	Membrane protein insertion efficiency factor YidD
LS0924	885224	886615	+	Aldehyde dehydrogenase (EC 1.2.1.3)
LS0925	886805	887413	+	SSU ribosomal protein S4p (S9e) @ SSU ribosomal protein S4p (S9e), zinc-independent
LS0926	887520	887987	+	tmRNA-binding protein SmpB
LS0927	888189	890456	+	hypothetical protein
LS0928	890800	890543	-	hypothetical protein
LS0929	891007	891870	+	Hydrolase, alpha/beta fold family
LS0930	892008	892730	+	Pentapeptide repeat family protein
LS0931	892845	893831	+	Gliding motility-associated ABC transporter ATP-binding protein GldA
LS0932	893880	894713	+	Gliding motility-associated ABC transporter permease protein GldF
LS0933	894852	896408	+	Gliding motility-associated ABC transporter substrate-binding protein GldG
LS0934	896433	897281	+	Manganese ABC transporter, inner membrane permease protein SitD
LS0935	897439	897675	+	hypothetical protein
LS0936	898063	897713	-	hypothetical protein
LS0937	898399	899463	+	hypothetical protein
LS0938	900619	899465	-	Carbamoyl-phosphate synthase small chain (EC 6.3.5.5)
LS0939	900655	901710	+	hypothetical protein
LS0940	902558	903115	+	hypothetical protein
LS0941	903212	905464	+	Replication-associated recombination protein RarA
LS0942	905848	905552	-	hypothetical protein
LS0943	906221	906099	-	hypothetical protein
LS0944	906346	906696	+	hypothetical protein
LS0945	906733	909486	+	Acetyl-CoA synthetase (ADP-forming) alpha and beta chains, putative
LS0946	909985	911049	+	Phage integrase
LS0947	911638	911081	-	hypothetical protein
LS0948	911985	911719	-	hypothetical protein
LS0949	912914	912024	-	hypothetical protein
LS0950	913674	913018	-	hypothetical protein
LS0951	914689	913799	-	hypothetical protein
LS0952	915294	914731	-	Mobile element protein
LS0953	915949	915479	-	hypothetical protein
LS0954	916148	917332	+	hypothetical protein
LS0955	917672	917376	-	Plasmid stabilization system protein
LS0956	917905	917669	-	hypothetical protein
LS0957	918027	917902	-	hypothetical protein
LS0958	918562	918014	-	Signal peptidase I (EC 3.4.21.89)
LS0959	918849	918598	-	hypothetical protein
LS0960	919975	918908	-	hypothetical protein
LS0961	920595	920017	-	hypothetical protein
LS0962	921293	920601	-	hypothetical protein
LS0963	921582	921370	-	hypothetical protein
LS0964	921887	921663	-	hypothetical protein
LS0965	922690	921953	-	hypothetical protein
LS0966	922857	922687	-	hypothetical protein
LS0967	924499	922859	-	IncW plasmid conjugative relaxase protein TrwC (TraI homolog)
LS0968	925102	924506	-	hypothetical protein
LS0969	925297	925169	-	hypothetical protein
LS0970	925516	926655	+	hypothetical protein
LS0971	926667	927164	+	hypothetical protein
LS0972	927201	927434	+	hypothetical protein
LS0973	927445	927720	+	hypothetical protein
LS0974	927989	927717	-	hypothetical protein
LS0975	928087	929361	+	Transposase, wcw_0483 family
LS0976	930541	929393	-	hypothetical protein
LS0977	930662	931387	+	hypothetical protein
LS0978	932409	931456	-	hypothetical protein
LS0979	932761	932477	-	hypothetical protein
LS0980	933706	932858	-	hypothetical protein
LS0981	934083	933787	-	hypothetical protein
LS0982	934464	934688	+	hypothetical protein
LS0983	934715	934870	+	hypothetical protein
LS0984	935067	938723	+	hypothetical protein
LS0985	938822	939292	+	hypothetical protein
LS0986	939477	940016	+	Mobile element protein
LS0987	940048	940782	+	Putative insecticidal toxin complex
LS0988	942072	940795	-	hypothetical protein
LS0989	942076	944175	+	hypothetical protein
LS0990	944217	944609	+	Transposase
LS0991	944606	945100	+	Mobile element protein
LS0992	945232	946785	+	hypothetical protein
LS0993	947027	947968	+	hypothetical protein
LS0994	947941	948543	+	hypothetical protein
LS0995	949631	948624	-	hypothetical protein
LS0996	949920	949693	-	hypothetical protein
LS0997	950131	950289	+	hypothetical protein
LS0998	950304	950732	+	hypothetical protein
LS0999	951255	950716	-	Mobile element protein
LS1000	951910	951440	-	hypothetical protein
LS1001	951979	952692	+	hypothetical protein
LS1002	952792	957060	+	hypothetical protein
LS1003	957527	957066	-	hypothetical protein
LS1004	958427	957600	-	hypothetical protein
LS1005	958660	958424	-	Flagellar motor switch protein FliG
LS1006	958894	958688	-	hypothetical protein
LS1007	959951	958911	-	Mobile element protein
LS1008	959963	960766	+	Argininosuccinate lyase (EC 4.3.2.1)
LS1009	960791	961321	+	hypothetical protein
LS1010	961318	961944	+	hypothetical protein
LS1011	962227	963021	+	Argininosuccinate lyase (EC 4.3.2.1)
LS1012	963031	963300	+	hypothetical protein
LS1013	964819	963302	-	hypothetical protein
LS1014	964836	964952	+	hypothetical protein
LS1015	965233	965646	+	6-carboxy-5,6,7,8-tetrahydropterin synthase (EC 4.1.2.50)
LS1016	965658	966380	+	7-cyano-7-deazaguanine synthase (EC 6.3.4.20)
LS1017	966876	966724	-	hypothetical protein
LS1018	966926	967195	+	hypothetical protein
LS1019	967255	967491	+	Flagellar motor switch protein FliG
LS1020	967488	968315	+	hypothetical protein
LS1021	968332	968679	+	hypothetical protein
LS1022	969303	968851	-	Cytochrome b6-f complex alternative Rieske iron sulfur protein PetC3
LS1023	969836	970141	+	hypothetical protein
LS1024	970204	970641	+	Transcriptional regulator, MerR family
LS1025	970690	972060	+	16S rRNA (cytosine(967)-C(5))-methyltransferase (EC 2.1.1.176)
LS1026	973756	972329	-	Pyruvate kinase (EC 2.7.1.40)
LS1027	976347	973822	-	Glycogen phosphorylase (EC 2.4.1.1)
LS1028	978894	976459	-	Xylulose-5-phosphate phosphoketolase (EC 4.1.2.9) @ Fructose-6-phosphate phosphoketolase (EC 4.1.2.22)
LS1029	979467	979342	-	hypothetical protein
LS1030	979530	981680	+	Polyphosphate kinase (EC 2.7.4.1)
LS1031	982395	981652	-	hypothetical protein
LS1032	987907	982529	-	hypothetical protein
LS1033	991917	988525	-	Two-component system sensor histidine kinase
LS1034	992854	992051	-	Esterase/lipase/thioesterase family protein
LS1035	993583	992861	-	Acyltransferase family protein
LS1036	993735	994625	+	Serine/threonine kinase
LS1037	994904	995587	+	hypothetical protein
LS1038	995584	995919	+	hypothetical protein
LS1039	996124	996609	+	hypothetical protein
LS1040	996683	997339	+	hypothetical protein
LS1041	997340	998194	+	Dipeptide ABC transporter, permease protein DppC (TC 3.A.1.5.2)
LS1042	998281	998568	+	hypothetical protein
LS1043	999434	1004641	+	hypothetical protein
LS1044	1004790	1005443	+	hypothetical protein
LS1045	1005906	1006142	+	Flagellar motor switch protein FliG
LS1046	1006139	1006477	+	hypothetical protein
LS1047	1006455	1006964	+	hypothetical protein
LS1048	1007196	1006987	-	hypothetical protein
LS1049	1007439	1007657	+	hypothetical protein
LS1050	1007681	1008544	+	hypothetical protein
LS1051	1008646	1008882	+	NifU-like domain protein
LS1052	1008962	1011208	+	Amylopullulanase
LS1053	1011419	1013704	+	Multimodular transpeptidase-transglycosylase (EC 2.4.1.129) (EC 3.4.-.-)
LS1054	1014280	1013765	-	Putative lumenal protein, contains 8 pentapeptide repeats, sll0301 homolog
LS1055	1014580	1014308	-	hypothetical protein
LS1056	1015634	1014864	-	Imidazole glycerol phosphate synthase cyclase subunit
LS1057	1015887	1016081	+	hypothetical protein
LS1058	1016301	1017398	+	anion-transporting ATPase
LS1059	1017413	1018471	+	Chlorophyll a synthase ChlG (EC 2.5.1.62)
LS1060	1018468	1018602	+	hypothetical protein
LS1061	1018629	1021061	+	Multimodular transpeptidase-transglycosylase (EC 2.4.1.129) (EC 3.4.-.-)
LS1062	1023739	1021058	-	Recombination inhibitory protein MutS2
LS1063	1023892	1024572	+	hypothetical protein
LS1064	1027076	1024629	-	TPR domain protein, putative component of TonB system
LS1065	1027422	1028858	+	Cell envelope-associated transcriptional attenuator LytR-CpsA-Psr, subfamily M
LS1066	1029765	1028818	-	Possible alpha/beta hydrolase superfamily, sll0553 homolog
LS1067	1030127	1030699	+	hypothetical protein
LS1068	1032032	1030779	-	Proton/glutamate symporter @ Sodium/glutamate symporter
LS1069	1032198	1032073	-	hypothetical protein
LS1070	1032366	1032232	-	hypothetical protein
LS1071	1032470	1034152	+	NADH dehydrogenase I subunit 4, Involved in photosystem-1 cyclic electron flow
LS1072	1034404	1034258	-	hypothetical protein
LS1073	1034577	1034696	+	hypothetical protein
LS1074	1034983	1035600	+	hypothetical protein
LS1075	1035961	1037244	+	hypothetical protein
LS1076	1037406	1037795	+	hypothetical protein
LS1077	1038953	1038018	-	Ribokinase (EC 2.7.1.15)
LS1078	1039485	1038991	-	hypothetical protein
LS1079	1040722	1039502	-	Type 2 NAD(P)H dehydrogenase (EC 1.6.5.12), reduces demethylnaphthoquinone precusor in phylloquinone and menaquinone biosynthesis
LS1080	1041446	1040808	-	Acyl-CoA:1-acyl-sn-glycerol-3-phosphate acyltransferase (EC 2.3.1.51)
LS1081	1042344	1041466	-	Malonyl CoA-acyl carrier protein transacylase (EC 2.3.1.39)
LS1082	1043347	1042349	-	3-oxoacyl-[acyl-carrier-protein] synthase, KASIII (EC 2.3.1.180)
LS1083	1044439	1043396	-	Phosphate:acyl-ACP acyltransferase PlsX (EC 2.3.1.n2)
LS1084	1044708	1046468	+	hypothetical protein
LS1085	1046775	1046542	-	hypothetical protein
LS1086	1047025	1047312	+	hypothetical protein
LS1087	1048023	1047415	-	hypothetical protein
LS1088	1048906	1048067	-	hypothetical protein
LS1089	1049152	1051233	+	Thymidylate synthase ThyX (EC 2.1.1.148) @ intein-containing
LS1090	1051658	1052053	+	hypothetical protein
LS1091	1052088	1052783	+	Polysaccharide deacetylase
LS1092	1053904	1052864	-	Zinc ABC transporter, substrate-binding protein ZnuA
LS1093	1053980	1054726	+	Manganese ABC transporter, ATP-binding protein SitB
LS1094	1054842	1056617	+	Bipolar DNA helicase HerA
LS1095	1057334	1058317	+	Cyanobacteria-specific RpoD-like sigma factor, type-3 @ Group 2 RNA polymerase sigma factor
LS1096	1058574	1058398	-	hypothetical protein
LS1097	1059672	1058779	-	hypothetical protein
LS1098	1060765	1059818	-	3-oxoacyl-[acyl-carrier-protein] synthase, KASIII (EC 2.3.1.180)
LS1099	1061312	1060782	-	hypothetical protein
LS1100	1061608	1061309	-	hypothetical protein
LS1101	1061841	1061605	-	Flagellar motor switch protein FliG
LS1102	1062941	1061901	-	3-oxoacyl-[acyl-carrier-protein] synthase III (EC 2.3.1.41)
LS1103	1064050	1063043	-	hypothetical protein
LS1104	1064122	1064298	+	hypothetical protein
LS1105	1064617	1065135	+	hypothetical protein
LS1106	1065212	1066534	+	Hemolysins and related proteins containing CBS domains
LS1107	1067506	1066547	-	Aldo/keto reductase
LS1108	1067911	1067621	-	hypothetical protein
LS1109	1068526	1068062	-	membrane protein, putative
LS1110	1068982	1068632	-	Fe-S cluster protein
LS1111	1069114	1069245	+	Photosystem II reaction center protein ycf12
LS1112	1070110	1069328	-	phospholipase/carboxylesterase
LS1113	1072244	1070169	-	Single-stranded-DNA-specific exonuclease RecJ
LS1114	1072496	1072278	-	hypothetical protein
LS1115	1072800	1072645	-	hypothetical protein
LS1116	1072803	1073978	+	FIG00557364: hypothetical protein
LS1117	1076387	1074237	-	Polyribonucleotide nucleotidyltransferase (EC 2.7.7.8)
LS1118	1076731	1080294	+	Helicase, SNF2/RAD54 family
LS1119	1080370	1080522	+	hypothetical protein
LS1120	1080547	1080963	+	hypothetical protein
LS1121	1081049	1081915	+	hypothetical protein
LS1122	1082050	1082196	+	hypothetical protein
LS1123	1082461	1083411	+	Two-component transcriptional response regulator, LuxR family
LS1124	1083829	1083479	-	Domain of unknown function / Tautomerase
LS1125	1083936	1084805	+	Hydrolase, alpha/beta fold family protein, At1g52510/AT4G12830 homolog
LS1126	1086194	1084836	-	S-adenosylhomocysteine deaminase (EC 3.5.4.28); Methylthioadenosine deaminase (EC 3.5.4.31)
LS1127	1087444	1086209	-	Metallo-dependent hydrolases, subgroup B
LS1128	1087881	1088411	+	Pentapeptide repeat family protein
LS1129	1088526	1088678	+	hypothetical protein
LS1130	1089124	1089252	+	hypothetical protein
LS1131	1090127	1089273	-	Formyltetrahydrofolate deformylase (EC 3.5.1.10)
LS1132	1090559	1090311	-	hypothetical protein
LS1133	1090912	1092978	+	Na+/H+ antiporter
LS1134	1093552	1093040	-	hypothetical protein
LS1135	1093576	1094250	+	Two-component transcriptional response regulator, LuxR family
LS1136	1094243	1095499	+	Periplasmic sensor signal transduction histidine kinase
LS1137	1095572	1096165	+	Mg/Co/Ni transporter MgtE, CBS domain-containing
LS1138	1097850	1096330	-	hypothetical protein
LS1139	1098266	1098003	-	hypothetical protein
LS1140	1099112	1098381	-	Gas vesicle protein GvpF
LS1141	1099638	1099435	-	hypothetical protein
LS1142	1099767	1099639	-	hypothetical protein
LS1143	1099783	1099896	+	hypothetical protein
LS1144	1099908	1100123	+	hypothetical protein
LS1145	1100120	1100233	+	hypothetical protein
LS1146	1103049	1100458	-	DNA translocase FtsK
LS1147	1105250	1103049	-	hypothetical protein
LS1148	1106208	1105321	-	hypothetical protein
LS1149	1106887	1106327	-	hypothetical protein
LS1150	1107012	1108175	+	Aspartate carbamoyltransferase (EC 2.1.3.2)
LS1151	1108172	1109200	+	Thiamine-monophosphate kinase (EC 2.7.4.16)
LS1152	1109496	1109636	+	hypothetical protein
LS1153	1109978	1111027	+	tRNA-modifying protein YgfZ
LS1154	1111159	1113015	+	hypothetical protein
LS1155	1113834	1113166	-	Phycobiliprotein lyase, HEAT subunit
LS1156	1114121	1115551	+	Glycosyltransferase
LS1157	1115588	1116376	+	hypothetical protein
LS1158	1117869	1116391	-	Sodium:galactoside symporter family protein
LS1159	1118050	1118577	+	Xanthine-guanine phosphoribosyltransferase (EC 2.4.2.22)
LS1160	1118691	1119149	+	hypothetical protein
LS1161	1120150	1119233	-	Auxin efflux carrier family protein
LS1162	1120275	1121081	+	D-alanyl-D-alanine carboxypeptidase (EC 3.4.16.4)
LS1163	1121188	1121907	+	hypothetical protein
LS1164	1121970	1122362	+	hypothetical protein
LS1165	1122534	1122656	+	Uncharacterized protein D082_03940
LS1166	1122862	1124565	+	Cleavage and polyadenylation specificity factor, 73 kDa subunit
LS1167	1124778	1125341	+	Peptide deformylase (EC 3.5.1.88)
LS1168	1125573	1125445	-	hypothetical protein
LS1169	1125724	1127127	+	FHA-domain-containing protein
LS1170	1127924	1127220	-	hypothetical protein
LS1171	1129679	1128021	-	FHA-domain-containing protein
LS1172	1132286	1129905	-	Serine/threonine protein phosphatase (EC 3.1.3.16)
LS1173	1132390	1132482	+	hypothetical protein
LS1174	1132595	1133602	+	Phosphate ABC transporter, substrate-binding protein PstS (TC 3.A.1.7.1)
LS1175	1133737	1134762	+	Phosphate ABC transporter, permease protein PstC (TC 3.A.1.7.1)
LS1176	1134764	1135702	+	Phosphate ABC transporter, permease protein PstA (TC 3.A.1.7.1)
LS1177	1135696	1136496	+	Phosphate ABC transporter, ATP-binding protein PstB (TC 3.A.1.7.1)
LS1178	1137111	1136536	-	hypothetical protein
LS1179	1137376	1137164	-	Protein of unknown function DUF820
LS1180	1138449	1137373	-	hypothetical protein
LS1181	1138628	1139533	+	Fructose-bisphosphate aldolase class II (EC 4.1.2.13)
LS1182	1139897	1139661	-	hypothetical protein
LS1183	1140347	1140234	-	hypothetical protein
LS1184	1140362	1141810	+	Glutamyl-tRNA synthetase (EC 6.1.1.17) @ Glutamyl-tRNA(Gln) synthetase (EC 6.1.1.24)
LS1185	1141880	1142491	+	DNA-3-methyladenine glycosylase II (EC 3.2.2.21)
LS1186	1142690	1144180	+	Probable poly(beta-D-mannuronate) O-acetylase (EC 2.3.1.-)
LS1187	1144241	1144738	+	hypothetical protein
LS1188	1145848	1144760	-	Chorismate synthase (EC 4.2.3.5)
LS1189	1146307	1145927	-	hypothetical protein
LS1190	1146507	1146373	-	hypothetical protein
LS1191	1147000	1146518	-	Cytochrome b6-f complex subunit IV (PetD)
LS1192	1147784	1147116	-	Cytochrome b6-f complex subunit, cytochrome b6
LS1193	1148104	1149360	+	carboxyl-terminal processing protease
LS1194	1149350	1150612	+	dNTP triphosphohydrolase, broad substrate specificity
LS1195	1151643	1150729	-	FIG068086: hypothetical protein
LS1196	1152675	1151734	-	Arylsulfatase (EC 3.1.6.1)
LS1197	1153471	1152869	-	hypothetical protein
LS1198	1154385	1153444	-	hypothetical protein
LS1199	1154910	1155653	+	hypothetical protein
LS1200	1156143	1155610	-	Arylsulfatase (EC 3.1.6.1)
LS1201	1156433	1157197	+	hypothetical protein
LS1202	1157233	1158561	+	hypothetical protein
LS1203	1158601	1158825	+	hypothetical protein
LS1204	1159904	1158930	-	Sulfatase modifying factor 1 precursor (C-alpha-formyglycine- generating enzyme 1)
LS1205	1160245	1160622	+	hypothetical protein
LS1206	1160808	1161002	+	hypothetical protein
LS1207	1161646	1161020	-	hypothetical protein
LS1208	1162173	1161643	-	hypothetical protein
LS1209	1163677	1162346	-	hypothetical protein
LS1210	1164447	1163761	-	hypothetical protein
LS1211	1164625	1164795	+	hypothetical protein
LS1212	1165061	1165906	+	hypothetical protein
LS1213	1166350	1166120	-	hypothetical protein
LS1214	1169712	1166458	-	RND efflux system, inner membrane transporter
LS1215	1171314	1169890	-	hypothetical protein
LS1216	1171971	1171417	-	hypothetical protein
LS1217	1172301	1172188	-	hypothetical protein
LS1218	1173077	1175119	+	Alkyl sulfatase and related hydrolases, MBL-fold metallo-hydrolase superfamily
LS1219	1175178	1175927	+	hypothetical protein
LS1220	1176053	1176580	+	hypothetical protein
LS1221	1176751	1176849	+	hypothetical protein
LS1222	1177377	1177664	+	hypothetical protein
LS1223	1177748	1178755	+	hypothetical protein
LS1224	1178888	1179940	+	hypothetical protein
LS1225	1179986	1180132	+	hypothetical protein
LS1226	1180133	1180285	+	hypothetical protein
LS1227	1180990	1180334	-	Slr1315 protein
LS1228	1181102	1182778	+	Sulfate permease, sulP
LS1229	1182775	1182918	+	hypothetical protein
LS1230	1184171	1183134	-	Hemerythrin domain protein
LS1231	1184238	1184477	+	hypothetical protein
LS1232	1184498	1185637	+	Saccharopine dehydrogenase and related proteins
LS1233	1187038	1185818	-	Phosphoglycerate kinase (EC 2.7.2.3)
LS1234	1187270	1187097	-	hypothetical protein
LS1235	1187275	1187694	+	hypothetical protein
LS1236	1188468	1187665	-	Two-component system sensor histidine kinase/response regulator hybrid
LS1237	1188866	1188525	-	hypothetical protein
LS1238	1191513	1188928	-	Two-component system sensor histidine kinase/response regulator hybrid
LS1239	1191992	1191519	-	hypothetical protein
LS1240	1194078	1192003	-	Multidomain signal transduction protein including CheB-like methylesterase, CheR-like methyltransferase and BaeS-like histidine kinase
LS1241	1195318	1194740	-	hypothetical protein
LS1242	1195632	1196159	+	hypothetical protein
LS1243	1196356	1198230	+	Hypothetical protein, slr1506/slr1944 homolog
LS1244	1200356	1198347	-	Sodium/hydrogen exchanger family protein
LS1245	1201590	1200364	-	Membrane-bound lytic murein transglycosylase A
LS1246	1201898	1201599	-	hypothetical protein
LS1247	1202765	1201998	-	hypothetical protein
LS1248	1202982	1203101	+	hypothetical protein
LS1249	1203562	1203263	-	hypothetical protein
LS1250	1203699	1205948	+	DNA ligase (NAD(+)) (EC 6.5.1.2)
LS1251	1208056	1205945	-	Two-component system sensor histidine kinase
LS1252	1208272	1209144	+	5'-methylthioadenosine phosphorylase (EC 2.4.2.28)
LS1253	1209299	1209652	+	hypothetical protein
LS1254	1210966	1209875	-	BioD-like N-terminal domain of phosphotransacetylase
LS1255	1212112	1211120	-	Cysteine synthase (EC 2.5.1.47)
LS1256	1212464	1213099	+	hypothetical protein
LS1257	1214054	1213170	-	ABC transporter, permease protein 2 (cluster 5, nickel/peptides/opines)
LS1258	1214861	1214106	-	hypothetical protein
LS1259	1215035	1216498	+	Phosphoglucosamine mutase (EC 5.4.2.10)
LS1260	1217202	1216582	-	hypothetical protein
LS1261	1217283	1217897	+	hypothetical protein
LS1262	1223827	1217939	-	hypothetical protein
LS1263	1225337	1224072	-	Transposase
LS1264	1226211	1225579	-	hypothetical protein
LS1265	1226390	1226250	-	hypothetical protein
LS1266	1226577	1227851	+	Transposase, wcw_0483 family
LS1267	1227928	1228107	+	hypothetical protein
LS1268	1228104	1228361	+	hypothetical protein
LS1269	1230464	1228353	-	hypothetical protein
LS1270	1231093	1230461	-	hypothetical protein
LS1271	1231647	1231264	-	hypothetical protein
LS1272	1231880	1231644	-	Prevent-host-death protein
LS1273	1233773	1231935	-	hypothetical protein
LS1274	1234013	1235488	+	Mobile element protein
LS1275	1235893	1236816	+	hypothetical protein
LS1276	1236822	1240337	+	hypothetical protein
LS1277	1240382	1241026	+	Flavodoxin reductases (ferredoxin-NADPH reductases) family 1
LS1278	1241079	1241891	+	Uncharacterized protein MSMEG_1245
LS1279	1241942	1242535	+	hypothetical protein
LS1280	1242617	1243339	+	Domain of unknown function (DUF820)
LS1281	1243549	1244487	+	hypothetical protein
LS1282	1244767	1245003	+	hypothetical protein
LS1283	1245032	1247320	+	hypothetical protein
LS1284	1247377	1247520	+	hypothetical protein
LS1285	1247919	1247638	-	hypothetical protein
LS1286	1248002	1248601	+	hypothetical protein
LS1287	1248598	1249278	+	hypothetical protein
LS1288	1249275	1250456	+	Cysteine desulfurase (EC 2.8.1.7)
LS1289	1251375	1250518	-	Peptidase M48, Ste24p precursor
LS1290	1252639	1251638	-	hypothetical protein
LS1291	1254625	1252793	-	Aspartokinase (EC 2.7.2.4)
LS1292	1254729	1255274	+	FIG00943694: hypothetical protein
LS1293	1256085	1255294	-	hypothetical protein
LS1294	1257296	1256085	-	Magnesium and cobalt transport protein CorA
LS1295	1258668	1257328	-	hypothetical protein
LS1296	1259531	1258860	-	Global nitrogen regulatory protein, CRP family of transcriptional regulators
LS1297	1259924	1260700	+	Enoyl-[acyl-carrier-protein] reductase [NADH] (EC 1.3.1.9)
LS1298	1261966	1260758	-	Chromate transport protein ChrA
LS1299	1262514	1263596	+	hypothetical protein
LS1300	1264623	1263619	-	hypothetical protein
LS1301	1265133	1264636	-	Crossover junction endodeoxyribonuclease RuvC (EC 3.1.22.4)
LS1302	1265789	1266106	+	hypothetical protein
LS1303	1266355	1266891	+	alkyl hydroperoxide reductase/ Thiol specific antioxidant/ Mal allergen
LS1304	1267096	1266959	-	hypothetical protein
LS1305	1267159	1268226	+	Homogentisate phytyltransferase (EC 2.5.1.115) @ Homogentisate geranylgeranyltransferase (EC 2.5.1.116)
LS1306	1268621	1268232	-	hypothetical protein
LS1307	1268691	1268813	+	hypothetical protein
LS1308	1269754	1268807	-	ABC transporter, substrate-binding protein (cluster 13, osmolytes)
LS1309	1269856	1270686	+	ATP-utilizing enzyme of the PP-loop superfamily
LS1310	1270823	1271470	+	Protein of unknown function DUF820
LS1311	1272652	1271474	-	hypothetical protein
LS1312	1273024	1272911	-	hypothetical protein
LS1313	1273195	1275798	+	Long-chain-fatty-acid--CoA ligase (EC 6.2.1.3)
LS1314	1275903	1277066	+	hypothetical protein
LS1315	1278078	1277101	-	Cystathionine beta-synthase (EC 4.2.1.22)
LS1316	1278289	1278900	+	hypothetical protein
LS1317	1278973	1279875	+	Prolipoprotein diacylglyceryl transferase
LS1318	1280649	1280134	-	hypothetical protein
LS1319	1280896	1280681	-	hypothetical protein
LS1320	1281545	1280976	-	hypothetical protein
LS1321	1281661	1281756	+	hypothetical protein
LS1322	1282715	1281765	-	Oxidoreductase
LS1323	1282788	1283093	+	hypothetical protein
LS1324	1283101	1284699	+	NAD(P)H-hydrate epimerase (EC 5.1.99.6) / ADP-dependent (S)-NAD(P)H-hydrate dehydratase (EC 4.2.1.136)
LS1325	1286487	1284769	-	L-aspartate oxidase (EC 1.4.3.16)
LS1326	1287029	1286574	-	Photosystem II 12 kDa extrinsic protein (PsbU)
LS1327	1288198	1287137	-	Adenylate cyclase (EC 4.6.1.1)
LS1328	1289058	1288327	-	hypothetical protein
LS1329	1289489	1290442	+	Undecaprenyl-diphosphatase (EC 3.6.1.27)
LS1330	1290519	1291853	+	hypothetical protein
LS1331	1292295	1294313	+	Protoporphyrin IX Mg-chelatase subunit D (EC 6.6.1.1)
LS1332	1295243	1294287	-	sodium/solute symporter family protein
LS1333	1297818	1295755	-	Glutamine--fructose-6-phosphate aminotransferase [isomerizing] (EC 2.6.1.16)
LS1334	1298022	1298918	+	33 kDa chaperonin HslO
LS1335	1298996	1301011	+	Chromosome segregation ATPases
LS1336	1301662	1301126	-	hypothetical protein
LS1337	1302596	1301838	-	Endonuclease, Uma2 family
LS1338	1302650	1303123	+	hypothetical protein
LS1339	1304476	1303265	-	Beta-lactamase class A-like and penicillin binding proteins (PBPs) superfamily
LS1340	1305810	1304536	-	Cytosine deaminase (EC 3.5.4.1)
LS1341	1306407	1305817	-	T-type phycobiliprotein lyase
LS1342	1307516	1306797	-	Orotidine 5'-phosphate decarboxylase (EC 4.1.1.23)
LS1343	1308061	1307513	-	hypothetical protein
LS1344	1309459	1308191	-	Tyrosyl-tRNA synthetase (EC 6.1.1.1)
LS1345	1309915	1311831	+	Multimodular transpeptidase-transglycosylase (EC 2.4.1.129) (EC 3.4.-.-)
LS1346	1311867	1312490	+	Holliday junction ATP-dependent DNA helicase RuvA (EC 3.6.4.12)
LS1347	1312653	1312922	+	SSU ribosomal protein S15p (S13e)
LS1348	1312940	1313521	+	hypothetical protein
LS1349	1313585	1314646	+	2-keto-3-deoxy-D-arabino-heptulosonate-7-phosphate synthase I beta (EC 2.5.1.54)
LS1350	1317580	1314821	-	Exonuclease SbcC
LS1351	1317860	1318474	+	L,D-transpeptidase
LS1352	1318508	1318645	+	hypothetical protein
LS1353	1319265	1318660	-	FIG00872888: hypothetical protein
LS1354	1320247	1319393	-	Membrane proteins related to metalloendopeptidases
LS1355	1320383	1321762	+	Cytochrome P450
LS1356	1321750	1322187	+	hypothetical protein
LS1357	1322777	1322202	-	hypothetical protein
LS1358	1323610	1322927	-	RNA polymerase sigma-70 factor
LS1359	1323913	1323761	-	hypothetical protein
LS1360	1324159	1324007	-	hypothetical protein
LS1361	1326050	1324140	-	Cell division-associated, ATP-dependent zinc metalloprotease FtsH
LS1362	1327355	1326180	-	N-acetylglucosamine-6-phosphate deacetylase (EC 3.5.1.25)
LS1363	1327641	1328684	+	diguanylate cyclase (GGDEF) domain-containing protein
LS1364	1329283	1328696	-	hypothetical protein
LS1365	1331471	1329396	-	Putative peptidase
LS1366	1332631	1332173	-	tRNA (cytidine(34)-2'-O)-methyltransferase (EC 2.1.1.207)
LS1367	1333332	1333120	-	hypothetical protein
LS1368	1333439	1333326	-	hypothetical protein
LS1369	1333516	1333641	+	hypothetical protein
LS1370	1333976	1334152	+	hypothetical protein
LS1371	1334152	1334394	+	hypothetical protein
LS1372	1337177	1334466	-	FIG005666: putative helicase
LS1373	1337210	1337353	+	hypothetical protein
LS1374	1338041	1338742	+	hypothetical protein
LS1375	1338910	1339143	+	hypothetical protein
LS1376	1339207	1341168	+	FIG00684568: hypothetical protein
LS1377	1341313	1341927	+	hypothetical protein
LS1378	1341933	1342754	+	Nucleoside-diphosphate-sugar epimerases
LS1379	1344220	1343129	-	dTDP-glucose 4,6-dehydratase (EC 4.2.1.46)
LS1380	1345634	1344348	-	Glycosyl transferase, group 1 family protein
LS1381	1345884	1346000	+	hypothetical protein
LS1382	1347377	1346304	-	Glucose-1-phosphate thymidylyltransferase (EC 2.7.7.24)
LS1383	1347950	1347405	-	dTDP-4-dehydrorhamnose 3,5-epimerase (EC 5.1.3.13)
LS1384	1349374	1348277	-	D-alanine--D-alanine ligase (EC 6.3.2.4)
LS1385	1349915	1349799	-	hypothetical protein
LS1386	1349970	1350272	+	hypothetical protein
LS1387	1351994	1350354	-	N-acetylmannosaminyltransferase (EC 2.4.1.187)
LS1388	1353243	1352221	-	Glycosyl transferase, group 2 family
LS1389	1354403	1353435	-	Quinolinate synthetase (EC 2.5.1.72)
LS1390	1356606	1354630	-	Excinuclease ABC subunit C
LS1391	1357424	1356756	-	Sll1318 protein
LS1392	1357670	1357473	-	Uncharacterized protein Ava_4585
LS1393	1359064	1357805	-	Rod shape-determining protein RodA
LS1394	1360198	1359128	-	Cytosolic Fe-S cluster assembling factor NBP35 / Chromosome (plasmid) partitioning protein ParA
LS1395	1360778	1360248	-	FIG00871906: hypothetical protein
LS1396	1361152	1362192	+	Coproporphyrinogen III oxidase, aerobic (EC 1.3.3.3)
LS1397	1362564	1362944	+	Anti-sigma B factor antagonist RsbV
LS1398	1363622	1362996	-	hypothetical protein
LS1399	1363742	1364497	+	hypothetical protein
LS1400	1364621	1366522	+	Arachidonate 15-lipoxygenase precursor (EC 1.13.11.33)
LS1401	1366612	1367136	+	Adenine phosphoribosyltransferase (EC 2.4.2.7)
LS1402	1367173	1368222	+	Oligopeptide ABC transporter, permease protein OppB (TC 3.A.1.5.1)
LS1403	1368232	1368531	+	FIG00566036: hypothetical protein
LS1404	1368617	1369609	+	ABC transporter, permease protein 2 (cluster 11, riboflavin/purine nucleoside/unknown)
LS1405	1370696	1369623	-	Nicotinamidase (EC 3.5.1.19)
LS1406	1371058	1372794	+	hypothetical protein
LS1407	1373057	1372812	-	hypothetical protein
LS1408	1373219	1373659	+	Peptidyl-prolyl cis-trans isomerase (EC 5.2.1.8)
LS1409	1374431	1373718	-	D-alanyl-D-alanine dipeptidase (EC 3.4.13.22)
LS1410	1375414	1374512	-	Cell-division-associated, ABC-transporter-like signaling protein FtsX
LS1411	1376321	1375479	-	hypothetical protein
LS1412	1377105	1376491	-	DnaJ-class molecular chaperone
LS1413	1377678	1378400	+	Two-component transcriptional response regulator, OmpR family
LS1414	1380214	1378469	-	Circadian input kinase A
LS1415	1380553	1382205	+	Uncharacterized ABC1 family protein
LS1416	1383347	1382367	-	Hypothetical glycine rich membrane protein DUF1517
LS1417	1383827	1383997	+	CAB/ELIP/HLIP family protein
LS1418	1386421	1384097	-	hypothetical protein
LS1419	1386672	1388120	+	Signal recognition particle protein Ffh
LS1420	1388250	1388498	+	SSU ribosomal protein S16p
LS1421	1388491	1388877	+	KH domain RNA binding protein YlqC
LS1422	1388892	1389857	+	Phosphate starvation-inducible protein PhoH, predicted ATPase
LS1423	1390969	1390010	-	Protein containing domains DUF403
LS1424	1392495	1391059	-	Protein containing domains DUF404, DUF407
LS1425	1392552	1392716	+	hypothetical protein
LS1426	1392787	1393896	+	hypothetical protein
LS1427	1395325	1393964	-	Glutathione reductase (EC 1.8.1.7)
LS1428	1396017	1395457	-	Peroxiredoxin family protein
LS1429	1396030	1396155	+	hypothetical protein
LS1430	1396205	1396675	+	Zinc uptake regulation protein Zur
LS1431	1398264	1396876	-	Phosphomethylpyrimidine synthase ThiC (EC 4.1.99.17)
LS1432	1398328	1398492	+	hypothetical protein
LS1433	1399668	1398496	-	hypothetical protein
LS1434	1399855	1402950	+	CRISPR-associated RAMP Cmr2
LS1435	1402952	1403596	+	hypothetical protein
LS1436	1403593	1404792	+	CRISPR-associated RAMP Cmr3
LS1437	1404789	1404962	+	hypothetical protein
LS1438	1405080	1405709	+	hypothetical protein
LS1439	1405989	1406906	+	CRISPR-associated RAMP Cmr4
LS1440	1406899	1407297	+	CRISPR-associated RAMP Cmr5
LS1441	1407294	1409306	+	CRISPR-associated RAMP Cmr6
LS1442	1409552	1409983	+	Transposase, IS200 family
LS1443	1410236	1410754	+	hypothetical protein
LS1444	1410867	1411364	+	hypothetical protein
LS1445	1411447	1411881	+	hypothetical protein
LS1446	1413009	1411969	-	Mobile element protein
LS1447	1413227	1414576	+	hypothetical protein
LS1448	1414794	1415417	+	hypothetical protein
LS1449	1415484	1415759	+	hypothetical protein
LS1450	1415775	1416767	+	CRISPR-associated protein Cas1
LS1451	1416779	1417057	+	CRISPR-associated protein Cas2
LS1452	1417423	1417232	-	hypothetical protein
LS1453	1417948	1417835	-	hypothetical protein
LS1454	1418189	1418055	-	hypothetical protein
LS1455	1418492	1418346	-	hypothetical protein
LS1456	1418554	1418775	+	hypothetical protein
LS1457	1419010	1418861	-	hypothetical protein
LS1458	1419706	1419350	-	hypothetical protein
LS1459	1420265	1419786	-	hypothetical protein
LS1460	1420373	1420603	+	hypothetical protein
LS1461	1420955	1420809	-	hypothetical protein
LS1462	1421076	1421399	+	hypothetical protein
LS1463	1421619	1421467	-	hypothetical protein
LS1464	1421903	1421709	-	hypothetical protein
LS1465	1422203	1421916	-	hypothetical protein
LS1466	1422673	1422479	-	hypothetical protein
LS1467	1423356	1423057	-	hypothetical protein
LS1468	1423490	1423377	-	hypothetical protein
LS1469	1423723	1423598	-	hypothetical protein
LS1470	1424031	1423756	-	hypothetical protein
LS1471	1424526	1424206	-	hypothetical protein
LS1472	1424720	1424890	+	hypothetical protein
LS1473	1424874	1425053	+	hypothetical protein
LS1474	1425199	1425074	-	hypothetical protein
LS1475	1425559	1425275	-	hypothetical protein
LS1476	1426040	1425912	-	hypothetical protein
LS1477	1426245	1426048	-	hypothetical protein
LS1478	1426571	1426335	-	hypothetical protein
LS1479	1426863	1426579	-	hypothetical protein
LS1480	1427327	1427025	-	hypothetical protein
LS1481	1427626	1427850	+	Molybdopterin oxidoreductase subunit, predicted; chaperone protein HtpG
LS1482	1427851	1428228	+	L-lactate dehydrogenase (EC 1.1.1.27)
LS1483	1429585	1428407	-	hypothetical protein
LS1484	1430242	1429619	-	hypothetical protein
LS1485	1430720	1430388	-	hypothetical protein
LS1486	1430959	1430705	-	hypothetical protein
LS1487	1431642	1431070	-	hypothetical protein
LS1488	1432910	1431714	-	S-adenosylmethionine synthetase (EC 2.5.1.6)
LS1489	1436155	1432988	-	Cation-transporting ATPase
LS1490	1436862	1436419	-	hypothetical protein
LS1491	1437465	1436902	-	hypothetical protein
LS1492	1437582	1437812	+	hypothetical protein
LS1493	1437991	1438104	+	hypothetical protein
LS1494	1439322	1438204	-	Mobile element protein
LS1495	1439748	1439605	-	hypothetical protein
LS1496	1439921	1439745	-	hypothetical protein
LS1497	1440353	1439949	-	hypothetical protein
LS1498	1442695	1440359	-	1,4-alpha-glucan (glycogen) branching enzyme, GH-13-type (EC 2.4.1.18)
LS1499	1443332	1442985	-	Probable 30S ribosomal protein PSRP-3
LS1500	1443796	1443683	-	hypothetical protein
LS1501	1443999	1444220	+	hypothetical protein
LS1502	1445291	1444332	-	hypothetical protein
LS1503	1445367	1446572	+	hypothetical protein
LS1504	1447381	1446896	-	hypothetical protein
LS1505	1448845	1447400	-	hypothetical protein
LS1506	1449830	1448970	-	hypothetical protein
LS1507	1450018	1449836	-	hypothetical protein
LS1508	1450063	1450893	+	Phage tail tape measure protein
LS1509	1451097	1452212	+	SAM-dependent methyltransferase
LS1510	1453155	1452280	-	S-formylglutathione hydrolase (EC 3.1.2.12)
LS1511	1454291	1453182	-	S-(hydroxymethyl)glutathione dehydrogenase (EC 1.1.1.284)
LS1512	1454631	1455776	+	hypothetical protein
LS1513	1456014	1456664	+	hypothetical protein
LS1514	1456696	1456809	+	hypothetical protein
LS1515	1457054	1459213	+	Mg(2+) transport ATPase, P-type (EC 3.6.3.2)
LS1516	1459296	1460237	+	hypothetical protein
LS1517	1460225	1460794	+	hypothetical protein
LS1518	1460877	1461044	+	hypothetical protein
LS1519	1462645	1461191	-	Two-component system sensor histidine kinase
LS1520	1462962	1462672	-	hypothetical protein
LS1521	1463983	1463087	-	ABC transporter, substrate-binding protein (cluster 3, basic aa/glutamine/opines)
LS1522	1464193	1464468	+	hypothetical protein
LS1523	1464551	1465429	+	hypothetical protein
LS1524	1465426	1466067	+	hypothetical protein
LS1525	1466097	1466255	+	hypothetical protein
LS1526	1466255	1466878	+	Mobile element protein
LS1527	1466875	1467480	+	Transposase
LS1528	1467558	1468211	+	hypothetical protein
LS1529	1468589	1468816	+	hypothetical protein
LS1530	1470651	1468993	-	1,4-alpha-glucan branching enzyme (EC 2.4.1.18)
LS1531	1472015	1470939	-	Mg protoporphyrin IX monomethyl ester oxidative cyclase (aerobic) (EC 1.14.13.81)
LS1532	1472273	1473025	+	Heme oxygenase (EC 1.14.99.3)
LS1533	1473290	1474687	+	Coproporphyrinogen III oxidase, oxygen-independent (EC 1.3.99.22)
LS1534	1474794	1476416	+	Mg-protoporphyrin IX monomethyl ester oxidative cyclase (anaerobic) (EC 1.14.13.81)
LS1535	1476452	1476955	+	Mg-protoporphyrin IX monomethyl ester oxidative cyclase (anaerobic) (EC 1.14.13.81)
LS1536	1477180	1478022	+	Fatty acid desaturase (EC 1.14.19.1); Delta-9 fatty acid desaturase (EC 1.14.19.1)
LS1537	1478861	1478037	-	hypothetical protein
LS1538	1479735	1479031	-	Alternative para-aminobenzoate biosynthesis enzyme CT610
LS1539	1480195	1484220	+	Protoporphyrin IX Mg-chelatase subunit H (EC 6.6.1.1)
LS1540	1484390	1485964	+	hypothetical protein
LS1541	1486521	1486333	-	SSU ribosomal protein S21p
LS1542	1486934	1486635	-	RNA-binding protein
LS1543	1487077	1487361	+	Pentapeptide repeat family protein
LS1544	1487615	1488055	+	Translation initiation factor 3
LS1545	1488062	1488187	+	hypothetical protein
LS1546	1488262	1488375	+	hypothetical protein
LS1547	1491340	1488533	-	Cation-transporting ATPase, E1-E2 family
LS1548	1492768	1491449	-	Pheophorbide a oxygenase (EC 1.14.12.20)
LS1549	1493711	1492830	-	Possible alpha/beta hydrolase superfamily, slr1235 homolog
LS1550	1493896	1494129	+	hypothetical protein
LS1551	1494286	1494161	-	hypothetical protein
LS1552	1494409	1494657	+	hypothetical protein
LS1553	1494733	1495659	+	Deacetylases, including yeast histone deacetylase and acetoin utilization protein
LS1554	1495901	1495692	-	hypothetical protein
LS1555	1495916	1497091	+	hypothetical protein
LS1556	1497789	1497088	-	Polyphosphate glucokinase (EC 2.7.1.63)
LS1557	1497911	1497786	-	hypothetical protein
LS1558	1498652	1497942	-	hypothetical protein
LS1559	1499359	1498652	-	Plasmid partitioning protein ParA
LS1560	1499734	1499483	-	hypothetical protein
LS1561	1499905	1500222	+	Thioredoxin
LS1562	1500503	1500637	+	hypothetical protein
LS1563	1500826	1501128	+	DNA-binding protein HU
LS1564	1501169	1502257	+	L-threonine 3-O-phosphate decarboxylase (EC 4.1.1.81)
LS1565	1502412	1503863	+	Mercuric ion reductase (EC 1.16.1.1)
LS1566	1503954	1505444	+	FIG00559198: hypothetical protein
LS1567	1507565	1505667	-	protein of unknown function DUF323
LS1568	1507950	1507573	-	hypothetical protein
LS1569	1509399	1508209	-	Sulfate adenylyltransferase (EC 2.7.7.4)
LS1570	1509577	1509419	-	hypothetical protein
LS1571	1509739	1509596	-	Cytochrome b6-f complex subunit VIII (PetN)
LS1572	1509741	1509857	+	hypothetical protein
LS1573	1509880	1510380	+	hypothetical protein
LS1574	1511039	1510377	-	Flavin reductase (EC 1.5.1.30)
LS1575	1511218	1511856	+	Imidazoleglycerol-phosphate dehydratase (EC 4.2.1.19)
LS1576	1511900	1512355	+	Thiol peroxidase, Bcp-type (EC 1.11.1.15)
LS1577	1512563	1513018	+	ADP-ribose pyrophosphatase (EC 3.6.1.13)
LS1578	1514059	1513088	-	Isoaspartyl aminopeptidase (EC 3.4.19.5) @ Asp-X dipeptidase
LS1579	1514396	1514223	-	Uncharacterized protein Caur_1846
LS1580	1514613	1515464	+	tRNA (cytidine(32)/uridine(32)-2'-O)-methyltransferase (EC 2.1.1.200)
LS1581	1515724	1517739	+	Beta-lactamase class A-like and penicillin binding proteins (PBPs) superfamily
LS1582	1517752	1518831	+	Diaminohydroxyphosphoribosylaminopyrimidine deaminase (EC 3.5.4.26) / 5-amino-6-(5-phosphoribosylamino)uracil reductase (EC 1.1.1.193)
LS1583	1520582	1518897	-	Dipeptide ABC transporter, substrate-binding protein DppA (TC 3.A.1.5.2)
LS1584	1520913	1525412	+	Circadian input kinase A
LS1585	1526652	1525510	-	hypothetical protein
LS1586	1526805	1526918	+	hypothetical protein
LS1587	1527970	1527002	-	Glutathione synthetase (EC 6.3.2.3)
LS1588	1528395	1528138	-	Glutaredoxin 3 (Grx1)
LS1589	1529037	1528447	-	hypothetical protein
LS1590	1529474	1529313	-	hypothetical protein
LS1591	1529963	1529505	-	Gas vesicle protein GvpK
LS1592	1530359	1530042	-	hypothetical protein
LS1593	1530609	1530827	+	hypothetical protein
LS1594	1531367	1531501	+	hypothetical protein
LS1595	1531529	1532128	+	Intracellular protease
LS1596	1532132	1533127	+	hypothetical protein
LS1597	1533114	1534757	+	hypothetical protein
LS1598	1535336	1534785	-	hypothetical protein
LS1599	1536096	1535437	-	hypothetical protein
LS1600	1536181	1537518	+	D-alanyl-D-alanine carboxypeptidase-like protein
LS1601	1537529	1538176	+	16S rRNA (guanine(966)-N(2))-methyltransferase (EC 2.1.1.171)
LS1602	1538897	1538505	-	hypothetical protein
LS1603	1539250	1539681	+	hypothetical protein
LS1604	1539710	1540468	+	FOG: HEAT repeat
LS1605	1540533	1541369	+	Nucleoside triphosphate pyrophosphohydrolase MazG (EC 3.6.1.8)
LS1606	1541422	1542108	+	Adenosylhopane nucleosidase, HpnG
LS1607	1542105	1543622	+	hypothetical protein
LS1608	1543770	1544084	+	RNA-binding protein
LS1609	1544312	1544488	+	SSU ribosomal protein S21p
LS1610	1544573	1545106	+	Acetolactate synthase small subunit (EC 2.2.1.6)
LS1611	1545240	1546424	+	serine/threonine kinase
LS1612	1546983	1546528	-	hypothetical protein
LS1613	1547075	1547194	+	hypothetical protein
LS1614	1547485	1548528	+	Queuine tRNA-ribosyltransferase (EC 2.4.2.29)
LS1615	1548666	1548803	+	Photosystem II protein PsbK
LS1616	1549047	1549643	+	hypothetical protein
LS1617	1550851	1549688	-	Ferrochelatase, protoheme ferro-lyase (EC 4.99.1.1)
LS1618	1551275	1551015	-	hypothetical protein
LS1619	1551416	1551535	+	hypothetical protein
LS1620	1551587	1552399	+	hypothetical protein
LS1621	1553792	1552437	-	Biotin carboxylase of acetyl-CoA carboxylase (EC 6.3.4.14)
LS1622	1554685	1553951	-	hypothetical protein
LS1623	1554864	1556255	+	hypothetical protein
LS1624	1556776	1556267	-	hypothetical protein
LS1625	1556984	1558570	+	hypothetical protein
LS1626	1558661	1559017	+	hypothetical protein
LS1627	1559029	1560111	+	Histidinol-phosphate aminotransferase (EC 2.6.1.9)
LS1628	1560172	1561038	+	hypothetical protein
LS1629	1561016	1562098	+	Glycosyl transferase, group 1
LS1630	1562218	1562847	+	Ribonuclease D related protein
LS1631	1562852	1564168	+	Cytosine deaminase (EC 3.5.4.1)
LS1632	1564787	1564179	-	hypothetical protein
LS1633	1565038	1564841	-	SSU ribosomal protein S21p
LS1634	1565212	1565051	-	hypothetical protein
LS1635	1565538	1565233	-	RNA-binding protein
LS1636	1565738	1566151	+	hypothetical protein
LS1637	1566431	1566135	-	hypothetical protein
LS1638	1566499	1567797	+	Glutamate-1-semialdehyde 2,1-aminomutase (EC 5.4.3.8)
LS1639	1568005	1567841	-	hypothetical protein
LS1640	1570174	1568177	-	hypothetical protein
LS1641	1571186	1570365	-	Thioredoxin
LS1642	1571702	1571373	-	Uncharacterized protein sll0609
LS1643	1572092	1571790	-	Uncharacterized protein sll0608
LS1644	1572278	1573336	+	Polysaccharide pyruvyl transferase CsaB
LS1645	1573594	1575444	+	hypothetical protein
LS1646	1575510	1577162	+	motif=tubulin-beta mRNA autoregulation signal
LS1647	1577369	1577884	+	Inorganic pyrophosphatase (EC 3.6.1.1)
LS1648	1578112	1578519	+	Aspartate 1-decarboxylase (EC 4.1.1.11)
LS1649	1578542	1579408	+	Metallo-beta-lactamase superfamily protein
LS1650	1579530	1579910	+	Uncharacterized protein YaeR with similarity to glyoxylase family
LS1651	1580006	1580629	+	PatB and ORF2 genes
LS1652	1581536	1580691	-	FIG00872179: hypothetical protein
LS1653	1581736	1581611	-	hypothetical protein
LS1654	1581985	1582131	+	hypothetical protein
LS1655	1582218	1582418	+	hypothetical protein
LS1656	1582517	1583113	+	Protoporphyrinogen IX oxidase, novel form, HemJ (EC 1.3.-.-)
LS1657	1583599	1583312	-	hypothetical protein
LS1658	1584422	1583604	-	Twin-arginine translocation protein TatC
LS1659	1584538	1585071	+	hypothetical protein
LS1660	1585187	1587271	+	Biosynthetic arginine decarboxylase (EC 4.1.1.19)
LS1661	1589315	1587417	-	Chaperone protein DnaK
LS1662	1589523	1590872	+	Phosphoglycerate mutase (EC 5.4.2.11) @ Phosphoglycerate mutase, cyanobacterial form (EC 5.4.2.11)
LS1663	1590875	1592194	+	Dihydroorotase (EC 3.5.2.3)
LS1664	1592229	1592345	+	hypothetical protein
LS1665	1592523	1593170	+	Two-component transcriptional response regulator, LuxR family
LS1666	1593557	1593423	-	hypothetical protein
LS1667	1594377	1593544	-	Sulfate transport system permease protein CysW
LS1668	1595269	1594418	-	Sulfate transport system permease protein CysT
LS1669	1595941	1595462	-	hypothetical protein
LS1670	1597020	1596031	-	Fructokinase (EC 2.7.1.4)
LS1671	1597484	1597047	-	hypothetical protein
LS1672	1598220	1597858	-	hypothetical protein
LS1673	1598410	1599945	+	Abortive infection protein
LS1674	1599964	1600092	+	hypothetical protein
LS1675	1600092	1600691	+	Substrate-specific component BioY of biotin ECF transporter
LS1676	1600691	1601179	+	Lipoprotein signal peptidase (EC 3.4.23.36)
LS1677	1601308	1601826	+	N5-carboxyaminoimidazole ribonucleotide mutase (EC 5.4.99.18)
LS1678	1602066	1602359	+	hypothetical protein
LS1679	1602356	1602556	+	hypothetical protein
LS1680	1602778	1602996	+	hypothetical protein
LS1681	1602989	1603405	+	Protein of unknown function DUF132
LS1682	1603415	1603642	+	Protein of unknown function UPF0150
LS1683	1603716	1603838	+	hypothetical protein
LS1684	1605281	1604070	-	TPR domain protein, putative component of TonB system
LS1685	1605578	1606900	+	Gamma-glutamyl phosphate reductase (EC 1.2.1.41)
LS1686	1606911	1607246	+	hypothetical protein
LS1687	1607301	1607966	+	Endonuclease, Uma2 family
LS1688	1608062	1609930	+	Oligopeptide ABC transporter, ATP-binding protein OppF (TC 3.A.1.5.1)
LS1689	1609992	1610984	+	Ribonuclease BN
LS1690	1611268	1611068	-	hypothetical protein
LS1691	1611465	1612046	+	hypothetical protein
LS1692	1612232	1613314	+	Phosphate ABC transporter, substrate-binding protein PstS (TC 3.A.1.7.1)
LS1693	1613451	1614410	+	Phosphate ABC transporter, permease protein PstC (TC 3.A.1.7.1)
LS1694	1614496	1615395	+	Phosphate ABC transporter, permease protein PstA (TC 3.A.1.7.1)
LS1695	1615474	1616286	+	Phosphate ABC transporter, ATP-binding protein PstB (TC 3.A.1.7.1)
LS1696	1616458	1616865	+	Photosystem II protein Psb27
LS1697	1618018	1616957	-	Adenosine deaminase (EC 3.5.4.4)
LS1698	1618185	1619513	+	hypothetical protein
LS1699	1619619	1620980	+	Adenylosuccinate synthetase (EC 6.3.4.4)
LS1700	1621097	1621681	+	LSU ribosomal protein L25p
LS1701	1622679	1621750	-	hypothetical protein
LS1702	1622776	1623915	+	hypothetical protein
LS1703	1624806	1624078	-	hypothetical protein
LS1704	1625273	1624803	-	hypothetical protein
LS1705	1625524	1625372	-	hypothetical protein
LS1706	1627247	1625838	-	Multi-sensor signal transduction histidine kinase
LS1707	1627352	1628050	+	Phosphate regulon transcriptional regulatory protein PhoB (SphR)
LS1708	1628128	1630896	+	Cation-transporting ATPase, E1-E2 family
LS1709	1630963	1631322	+	hypothetical protein
LS1710	1631648	1631523	-	hypothetical protein
LS1711	1631777	1634770	+	UPF0182 protein AF1421
LS1712	1635412	1634777	-	exopolysaccharide synthesis protein ExoD-related protein
LS1713	1635697	1637322	+	Glyceraldehyde-3-phosphate dehydrogenase, putative
LS1714	1637618	1637463	-	hypothetical protein
LS1715	1637934	1639973	+	hypothetical protein
LS1716	1640014	1640157	+	hypothetical protein
LS1717	1640172	1641506	+	hypothetical protein
LS1718	1641595	1642032	+	hypothetical protein
LS1719	1642258	1643268	+	Cellulose-binding domain protein
LS1720	1644322	1643312	-	hypothetical protein
LS1721	1644561	1645658	+	hypothetical protein
LS1722	1646252	1645722	-	hypothetical protein
LS1723	1646697	1646602	-	hypothetical protein
LS1724	1646858	1646745	-	hypothetical protein
LS1725	1646894	1647409	+	predicted MutT-like hydrolases
LS1726	1647439	1647912	+	hypothetical protein
LS1727	1648069	1647938	-	hypothetical protein
LS1728	1648074	1648253	+	hypothetical protein
LS1729	1648310	1648693	+	Putative DNA methylase
LS1730	1648651	1648971	+	Excinuclease ABC subunit C
LS1731	1650213	1649071	-	hypothetical protein
LS1732	1650610	1650338	-	hypothetical protein
LS1733	1650843	1650607	-	hypothetical protein
LS1734	1651131	1651012	-	hypothetical protein
LS1735	1651231	1651470	+	hypothetical protein
LS1736	1651531	1651923	+	Transposase
LS1737	1651920	1652414	+	Mobile element protein
LS1738	1652449	1653060	+	Mobile element protein
LS1739	1653601	1653131	-	hypothetical protein
LS1740	1653913	1653731	-	hypothetical protein
LS1741	1654286	1654011	-	hypothetical protein
LS1742	1654507	1654283	-	hypothetical protein
LS1743	1655931	1654666	-	hypothetical protein
LS1744	1656161	1656370	+	hypothetical protein
LS1745	1656371	1656784	+	Sll2007 protein
LS1746	1657743	1657177	-	hypothetical protein
LS1747	1658366	1658154	-	hypothetical protein
LS1748	1658696	1658370	-	hypothetical protein
LS1749	1659212	1659427	+	hypothetical protein
LS1750	1659738	1659568	-	hypothetical protein
LS1751	1660083	1661060	+	hypothetical protein
LS1752	1664372	1661193	-	hypothetical protein
LS1753	1665262	1664369	-	hypothetical protein
LS1754	1665485	1667053	+	hypothetical protein
LS1755	1667731	1667132	-	hypothetical protein
LS1756	1671258	1667914	-	DNA double-strand break repair Rad50 ATPase
LS1757	1672345	1671329	-	EgtD-like SAM-dependent methyltransferase
LS1758	1672660	1672523	-	hypothetical protein
LS1759	1673122	1672700	-	Peptide-methionine (R)-S-oxide reductase MsrB (EC 1.8.4.12)
LS1760	1673228	1674406	+	hypothetical protein
LS1761	1674427	1676004	+	beta-glucosidase (EC 3.2.1.21)
LS1762	1676463	1676344	-	hypothetical protein
LS1763	1676496	1678613	+	hypothetical protein
LS1764	1679587	1678721	-	Cyclohexadienyl dehydrogenase (EC 1.3.1.12)(EC 1.3.1.43)
LS1765	1680690	1679605	-	4-hydroxyphenylpyruvate dioxygenase (EC 1.13.11.27)
LS1766	1681412	1688218	+	Polyketide synthase modules and related proteins
LS1767	1688290	1689354	+	Glycosyl transferase, group 2 family
LS1768	1689441	1690526	+	2-keto-3-deoxy-D-arabino-heptulosonate-7-phosphate synthase I alpha (EC 2.5.1.54)
LS1769	1690513	1690644	+	hypothetical protein
LS1770	1690693	1691976	+	hypothetical protein
LS1771	1692848	1692027	-	Cobalt ECF transporter, ATPase component of energizing module CbiO
LS1772	1693656	1692865	-	hypothetical protein
LS1773	1693988	1693653	-	Cobalt ECF transporter, additional substrate-binding protein CbiN
LS1774	1694750	1693992	-	Cobalt ECF transporter, substrate-binding protein CbiM
LS1775	1695138	1695980	+	TPR domain protein, putative component of TonB system
LS1776	1696107	1696931	+	TPR domain protein, putative component of TonB system
LS1777	1697025	1697837	+	TPR domain protein, putative component of TonB system
LS1778	1698744	1697914	-	RNA binding methyltransferase FtsJ like
LS1779	1698960	1698796	-	hypothetical protein
LS1780	1699829	1698966	-	hypothetical protein
LS1781	1700018	1702870	+	AcrB/AcrD/AcrF family protein
LS1782	1703678	1702881	-	Glutamine TRAP transporter, substrate-binding protein
LS1783	1704056	1703694	-	LSU ribosomal protein L20p
LS1784	1704310	1704113	-	LSU ribosomal protein L35p
LS1785	1704530	1704994	+	Bacterial ribosome SSU maturation protein RimP
LS1786	1705074	1706420	+	Transcription termination protein NusA
LS1787	1706433	1706702	+	COG2740: Predicted nucleic-acid-binding protein implicated in transcription termination
LS1788	1706970	1710155	+	Translation initiation factor 2
LS1789	1712462	1710285	-	hypothetical protein
LS1790	1712676	1715618	+	DNA polymerase I (EC 2.7.7.7)
LS1791	1715820	1716476	+	hypothetical protein
LS1792	1716712	1717713	+	Biotin synthase (EC 2.8.1.6)
LS1793	1717936	1718694	+	glycosyl transferase, WecB/TagA/CpsF family
LS1794	1719085	1718711	-	hypothetical protein
LS1795	1719419	1719934	+	Thiosulfate reductase cytochrome B subunit (membrane anchoring protein)
LS1796	1719943	1720665	+	probable sufite oxidase (EC 1.8.3.1)
LS1797	1721289	1720678	-	hypothetical protein
LS1798	1721435	1721767	+	hypothetical protein
LS1799	1721898	1723781	+	Xaa-Pro aminopeptidase (EC 3.4.11.9)
LS1800	1723832	1724290	+	hypothetical protein
LS1801	1728014	1724328	-	Circadian input kinase A
LS1802	1729793	1728318	-	Cytosol aminopeptidase PepA (EC 3.4.11.1)
LS1803	1730002	1732185	+	Soluble lytic murein transglycosylase (EC 4.2.2.n1)
LS1804	1732317	1733399	+	Photosystem II protein D1 (PsbA)
LS1805	1733609	1733740	+	hypothetical protein
LS1806	1733916	1733782	-	hypothetical protein
LS1807	1734553	1735917	+	cmpA, Bicarbonate ABC transporter, substrate-binding protein
LS1808	1736073	1736921	+	cmpB, Bicarbonate ABC transporter, permease protein
LS1809	1736960	1738972	+	cmpC, Bicarbonate ABC transporter, ATP-binding protein
LS1810	1738984	1739925	+	cmpD, Bicarbonate ABC transporter, ATP-binding protein
LS1811	1741503	1740127	-	ABC transporter, ATP-binding protein
LS1812	1743250	1741517	-	ABC transporter, permease protein
LS1813	1744697	1743339	-	Mg/Co/Ni transporter MgtE, CBS domain-containing
LS1814	1745026	1746561	+	hypothetical protein
LS1815	1746945	1746586	-	hypothetical protein
LS1816	1747049	1747498	+	Nucleoside diphosphate kinase (EC 2.7.4.6)
LS1817	1748459	1747683	-	hypothetical protein
LS1818	1748756	1748851	+	hypothetical protein
LS1819	1749063	1749437	+	hypothetical protein
LS1820	1750338	1749499	-	hypothetical protein
LS1821	1751845	1750802	-	FIG00557980: hypothetical protein
LS1822	1752362	1752637	+	Transglycosylase-associated protein
LS1823	1752711	1753022	+	hypothetical protein
LS1824	1753650	1753066	-	Leucyl/phenylalanyl-tRNA--protein transferase (EC 2.3.2.6)
LS1825	1753782	1754111	+	hypothetical protein
LS1826	1754114	1755322	+	hypothetical protein
LS1827	1755742	1755440	-	SSU ribosomal protein S14p (S29e) @ SSU ribosomal protein S14p (S29e), zinc-independent
LS1828	1756560	1755838	-	Endonuclease III (EC 4.2.99.18)
LS1829	1757906	1756557	-	Membrane-associated zinc metalloprotease
LS1830	1758071	1758256	+	hypothetical protein
LS1831	1758241	1758537	+	hypothetical protein
LS1832	1758972	1758658	-	hypothetical protein
LS1833	1759109	1760728	+	Uncharacterized DUF4277-domain-containing protein, perhaps a transposase
LS1834	1761540	1760743	-	Two-component transcriptional response regulator, OmpR family
LS1835	1762379	1761684	-	hypothetical protein
LS1836	1763124	1765163	+	Elongation factor G-like protein RSP_2247
LS1837	1766083	1765292	-	hypothetical protein
LS1838	1766522	1766391	-	hypothetical protein
LS1839	1766601	1766987	+	hypothetical protein
LS1840	1768899	1767004	-	Serine/threonine kinase
LS1841	1770572	1769385	-	cAMP-binding proteins - catabolite gene activator and regulatory subunit of cAMP-dependent protein kinases
LS1842	1770752	1770889	+	hypothetical protein
LS1843	1770967	1771218	+	hypothetical protein
LS1844	1772778	1771366	-	RND efflux system, membrane fusion protein
LS1845	1773392	1772784	-	FIG00857512: hypothetical protein
LS1846	1773849	1775852	+	hypothetical protein
LS1847	1775872	1777392	+	hypothetical protein
LS1848	1777442	1777819	+	Two-component transcriptional response regulator, LuxR family
LS1849	1777953	1778630	+	hypothetical protein
LS1850	1778799	1779182	+	hypothetical protein
LS1851	1779247	1779597	+	hypothetical protein
LS1852	1780371	1779601	-	hypothetical protein
LS1853	1780880	1780455	-	hypothetical protein
LS1854	1781182	1782294	+	hypothetical protein
LS1855	1783471	1782416	-	HtrA protease/chaperone protein
LS1856	1784320	1783568	-	hypothetical protein
LS1857	1784608	1785267	+	hypothetical protein
LS1858	1785367	1785789	+	hypothetical protein
LS1859	1786459	1785875	-	hypothetical protein
LS1860	1787804	1786542	-	Cysteine desulfurase (EC 2.8.1.7) => SufS
LS1861	1789262	1787904	-	Iron-sulfur cluster assembly protein SufD
LS1862	1790044	1789259	-	Iron-sulfur cluster assembly ATPase protein SufC
LS1863	1790732	1790103	-	hypothetical protein
LS1864	1791764	1790736	-	hypothetical protein
LS1865	1792224	1791790	-	hypothetical protein
LS1866	1793661	1792225	-	Iron-sulfur cluster assembly protein SufB
LS1867	1794294	1793932	-	Ferredoxin
LS1868	1794308	1794433	+	hypothetical protein
LS1869	1794439	1795089	+	Iron-sulfur cluster regulator SufR
LS1870	1795096	1795476	+	hypothetical protein
LS1871	1796547	1795777	-	Inactivated Zn-dependent hydrolase of the beta-lactamase fold
LS1872	1797220	1796615	-	Anthranilate synthase, amidotransferase component (EC 4.1.3.27)
LS1873	1797502	1797627	+	hypothetical protein
LS1874	1798220	1797741	-	Diacylglycerol kinase (EC 2.7.1.107)
LS1875	1798898	1798338	-	Metal-dependent hydrolase YbeY, involved in rRNA and/or ribosome maturation and assembly
LS1876	1799100	1798909	-	hypothetical protein
LS1877	1800108	1799161	-	Peptide chain release factor 2 @ programmed frameshift-containing
LS1878	1801167	1800439	-	Integral membrane protein, interacts with FtsH
LS1879	1801532	1802317	+	Cyanobacterial SigF-related sigma factor
LS1880	1803435	1802536	-	4-hydroxybenzoate polyprenyltransferase (EC 2.5.1.39)
LS1881	1804587	1803502	-	hypothetical protein
LS1882	1804765	1805499	+	Phosphoribosylaminoimidazole-succinocarboxamide synthase (EC 6.3.2.6)
LS1883	1805675	1808164	+	Outer membrane protein/protective antigen OMA87
LS1884	1808164	1809156	+	UDP-3-O-[3-hydroxymyristoyl] N-acetylglucosamine deacetylase (EC 3.5.1.108)
LS1885	1809228	1809764	+	3-hydroxyacyl-[acyl-carrier-protein] dehydratase, FabZ form (EC 4.2.1.59)
LS1886	1809801	1810631	+	Acyl-[acyl-carrier-protein]--UDP-N-acetylglucosamine O-acyltransferase (EC 2.3.1.129)
LS1887	1810624	1811823	+	Lipid-A-disaccharide synthase (EC 2.4.1.182)
LS1888	1813046	1812009	-	Cyanobacteria-specific RpoD-like sigma factor, type-1
LS1889	1813166	1813053	-	hypothetical protein
LS1890	1815689	1813557	-	Polyphosphate kinase (EC 2.7.4.1)
LS1891	1815912	1815682	-	hypothetical protein
LS1892	1815991	1816893	+	hypothetical protein
LS1893	1818413	1816968	-	6-phosphogluconate dehydrogenase, decarboxylating (EC 1.1.1.44)
LS1894	1818655	1818503	-	hypothetical protein
LS1895	1818808	1819986	+	hypothetical protein
LS1896	1821493	1820021	-	TldD protein, part of TldE/TldD proteolytic complex
LS1897	1821852	1823120	+	AmpG permease
LS1898	1823297	1823527	+	hypothetical protein
LS1899	1823550	1824065	+	hypothetical protein
LS1900	1824217	1824417	+	hypothetical protein
LS1901	1826626	1824623	-	Putative glycogen debranching enzyme, archaeal type, TIGR01561
LS1902	1826965	1826705	-	hypothetical protein
LS1903	1827019	1827219	+	5-formyltetrahydrofolate cyclo-ligase (EC 6.3.3.2)
LS1904	1827216	1827677	+	NTP pyrophosphohydrolases including oxidative damage repair enzymes
LS1905	1828554	1827712	-	Protein with domain similar to SecA
LS1906	1828587	1828697	+	hypothetical protein
LS1907	1828868	1830262	+	Serine/threonine protein kinase
LS1908	1830371	1830940	+	Sll0218 protein
LS1909	1830982	1832769	+	NAD(P)H-quinone oxidoreductase chain 5 (EC 1.6.5.2)
LS1910	1833513	1832827	-	Potassium channel protein
LS1911	1833917	1833510	-	Ankyrin
LS1912	1834284	1834168	-	hypothetical protein
LS1913	1835381	1834323	-	Photosystem II protein D2 (PsbD)
LS1914	1836552	1835659	-	Transglutaminase-like
LS1915	1837827	1836697	-	hypothetical protein
LS1916	1840027	1837829	-	Two-component system sensor histidine kinase
LS1917	1840178	1840041	-	hypothetical protein
LS1918	1840250	1842823	+	hypothetical protein
LS1919	1843128	1844099	+	Nonaprenyl diphosphate synthase (geranylgeranyl-diphosphate specific) (EC 2.5.1.85)
LS1920	1844916	1844800	-	hypothetical protein
LS1921	1845418	1846695	+	Glycosyl transferase, group 1
LS1922	1846912	1847895	+	Porphobilinogen deaminase (EC 2.5.1.61)
LS1923	1848047	1849504	+	Glycogen synthase, ADP-glucose transglucosylase (EC 2.4.1.21)
LS1924	1849705	1850199	+	hypothetical protein
LS1925	1850416	1850303	-	hypothetical protein
LS1926	1851148	1850546	-	hypothetical protein
LS1927	1851424	1852110	+	Two-component transcriptional response regulator, LuxR family
LS1928	1852136	1854028	+	Adenylate cyclase (EC 4.6.1.1)
LS1929	1854444	1854689	+	hypothetical protein
LS1930	1855409	1854819	-	hypothetical protein
LS1931	1855534	1855872	+	hypothetical protein
LS1932	1855995	1856597	+	thioredoxin-like protein
LS1933	1856727	1857308	+	Type IV pilin PilA
LS1934	1857661	1858353	+	Protein of unknown function DUF820
LS1935	1861287	1858498	-	hypothetical protein
LS1936	1861470	1862732	+	Dihydroorotate dehydrogenase (quinone) (EC 1.3.5.2)
LS1937	1863791	1862895	-	N-acetylglutamate kinase (EC 2.7.2.8)
LS1938	1865512	1863974	-	Retinal pigment epithelial membrane protein
LS1939	1867212	1865755	-	Folate transporter 3
LS1940	1868598	1867369	-	Aluminum resistance protein
LS1941	1868740	1869555	+	Fatty acid desaturase (EC 1.14.19.1); Delta-9 fatty acid desaturase (EC 1.14.19.1)
LS1942	1870917	1869649	-	Uncharacterized cyanobacterial protein, sll0461 homolog, ProA-like, but lacks essential Cysteine residue at catalytic site
LS1943	1871337	1870921	-	hypothetical protein
LS1944	1873272	1872868	-	4Fe-4S ferredoxin, iron-sulfur binding
LS1945	1874052	1873471	-	Acetyltransferase (GNAT) family, Syn7942_2240 homolog
LS1946	1874080	1874193	+	hypothetical protein
LS1947	1874325	1874987	+	FIG00876381: hypothetical protein
LS1948	1875175	1877988	+	Protein translocase subunit SecA
LS1949	1878291	1879475	+	hypothetical protein
LS1950	1880702	1879590	-	Patatin
LS1951	1881412	1880747	-	hypothetical protein
LS1952	1882966	1881512	-	hypothetical protein
LS1953	1883276	1886908	+	WD-repeat protein
LS1954	1886962	1889367	+	hypothetical protein
LS1955	1889529	1890119	+	High-affnity carbon uptake protein Hat/HatR
LS1956	1890187	1890363	+	hypothetical protein
LS1957	1890527	1890652	+	hypothetical protein
LS1958	1890692	1892917	+	ATP-dependent DNA helicase RecQ
LS1959	1894316	1892961	-	3-phosphoshikimate 1-carboxyvinyltransferase (EC 2.5.1.19)
LS1960	1894438	1894932	+	hypothetical protein
LS1961	1896481	1894940	-	hypothetical protein
LS1962	1897374	1896499	-	Cellobiose phosphotransferase system YdjC-like protein
LS1963	1898941	1897469	-	Fe-S oxidoreductase
LS1964	1899877	1899011	-	hypothetical protein
LS1965	1901220	1899979	-	hypothetical protein
LS1966	1901470	1901318	-	hypothetical protein
LS1967	1902364	1901711	-	hypothetical protein
LS1968	1902472	1902606	+	hypothetical protein
LS1969	1902802	1902641	-	hypothetical protein
LS1970	1903049	1903258	+	hypothetical protein
LS1971	1903255	1904322	+	6-phosphofructokinase (EC 2.7.1.11)
LS1972	1906432	1904405	-	Serine/threonine protein kinase
LS1973	1906544	1906660	+	hypothetical protein
LS1974	1906675	1906839	+	hypothetical protein
LS1975	1907627	1907046	-	hypothetical protein
LS1976	1907701	1908258	+	hypothetical protein
LS1977	1908408	1908262	-	hypothetical protein
LS1978	1908874	1908485	-	hypothetical protein
LS1979	1910413	1909901	-	hypothetical protein
LS1980	1910657	1910481	-	hypothetical protein
LS1981	1911004	1911156	+	hypothetical protein
LS1982	1911268	1911390	+	hypothetical protein
LS1983	1911514	1912122	+	hypothetical protein
LS1984	1912139	1913320	+	Carboxypeptidase G2
LS1985	1913407	1914444	+	hypothetical malic enzyme protein
LS1986	1914448	1915134	+	Lipase
LS1987	1916426	1916040	-	Photosystem II 13 kDa protein Psb28 (PsbW)
LS1988	1916917	1916429	-	hypothetical protein
LS1989	1918729	1917023	-	Pentapeptide repeat family protein
LS1990	1919420	1918785	-	hypothetical protein
LS1991	1920096	1919446	-	hypothetical protein
LS1992	1921127	1920141	-	hypothetical protein
LS1993	1921866	1921312	-	hypothetical protein
LS1994	1922454	1924505	+	Translation elongation factor G
LS1995	1924601	1924723	+	hypothetical protein
LS1996	1924813	1925343	+	hypothetical protein
LS1997	1925497	1927131	+	NAD(P) transhydrogenase N-domain of subunit alpha (EC 1.6.1.2) / NAD(P) transhydrogenase C-domain of subunit alpha (EC 1.6.1.2)
LS1998	1927297	1928709	+	NAD(P) transhydrogenase subunit beta (EC 1.6.1.2)
[truncated: 3,460 more rows]

## Sheet: Supplementary Table 3
Supplementary Table 3 In silico DNA-DNA hybridization (DDH) between Leptodesmis sp. A121 and related strains
Query genome	Reference genome		DDH	Distance	Prob. DDH >= 70%
Leptodesmis sp. A121	CP001344	Cyanothece sp. PCC7425	23.6	0.1853	0
Leptodesmis sp. A121	CP018092	Synechococcus lividus PCC6715	25.5	0.1702	0.01
Leptodesmis sp. A121	CP021983	Halomicronema hongdechloris C2206	23.2	0.1888	0
Leptodesmis sp. A121	CP053661	Thermoleptolyngbya sp. PKUAC-SCTA183	26.7	0.1621	0.02
Leptodesmis sp. A121	CP070366	Thermoleptolyngbya sp. PKUAC-SCTB121	27.6	0.1561	0.04
Leptodesmis sp. A121	DVEA00000000	Thermoleptolyngbya sp. M55 K2018 002	21.2	0.2076	0
Leptodesmis sp. A121	CP072600	Leptolyngbya sp. E412	26.6	0.163	0.02
Leptodesmis sp. A121	JAAUSG00000000	Leptolyngbyaceae cyanobacterium RU5 1	20.9	0.2102	0
Leptodesmis sp. A121	JAAUTN00000000	Leptolyngbyaceae cyanobacterium SM1 4 3	21	0.2094	0
Leptodesmis sp. A121	JACJOF00000000	Nodosilinea sp. FACHB-131	22.8	0.1918	0
Leptodesmis sp. A121	JACJQN00000000	Phormidium tenue FACHB-1052	23.7	0.1845	0
Leptodesmis sp. A121	JACJRC00000000	Alkalinema sp. FACHB-956	23.5	0.1858	0
Leptodesmis sp. A121	JACXWX00000000	Phormidium tenue FACHB-886	22.9	0.191	0
Leptodesmis sp. A121	JACYLO00000000	Elainella sp. C42 A2020 010	21	0.2093	0
Leptodesmis sp. A121	JJML000000000	Neosynechococcus_sphagnicola_sy1	24.3	0.1798	0.01
Leptodesmis sp. A121	JTHE00000000	Lyngbya confervoides BDU141951	22.8	0.1924	0
Leptodesmis sp. A121	MPPI00000000	Phormidesmis_priestleyi_ULC007	21.4	0.2053	0
Leptodesmis sp. A121	MRCG00000000	Phormidium tenue NIES-30	23.7	0.1845	0
Leptodesmis sp. A121	MUGG00000000	Alkalinema sp. CACIAM 70d	21.5	0.2038	0
Leptodesmis sp. A121	NKFP00000000	Leptolyngbya ohadii IS1	22.4	0.1955	0
Leptodesmis sp. A121	PVWK00000000	Stenomitos frigidus ULC18	20.3	0.2162	0
Leptodesmis sp. A121	QVFV00000000	Halomicronema excentricum str. Lakshadweep	22.5	0.1949	0
Leptodesmis sp. A121	REBM00000000	Leptolyngbya sp. LCM1.Bin17	19.1	0.2302	0
Leptodesmis sp. A121	RHGL00000000	Leptolyngbya sp. IPPAS B-1204 Mongol c46	22.3	0.1968	0
Leptodesmis sp. A121	SKLP00000000	Leptolyngbyaceae_cyanobacterium_CSSed162cmA_214	18	0.2444	0
Leptodesmis sp. A121	VRZD00000000	Pantanalinema sp. GBBB05NODE 46	19.5	0.2255	0
Leptodesmis sp. A121	WVIE00000000	Myxacorys_almedinensis_A	19.2	0.2294	0
Leptodesmis sp. A121	JACJPJ00000000	Oculatella_sp._FACHB-28.fsa_nt	21	0.2093	0
Leptodesmis sp. A121	CP046155	Leptolyngbya_sp._BL0902	22.7	0.1927	0
Leptodesmis sp. A121	RECH01000000	Leptolyngbya_sp._DLM2Bin15	18.4	0.2392	0
Leptodesmis sp. A121	KL662191	Leptolyngbya_sp._JSC-1	22	0.1991	0
Leptodesmis sp. A121	AP017367	Leptolyngbya_sp._O-77	31.8	0.1326	0.22
Leptodesmis sp. A121	AP014642	Leptolyngbya_boryana_dg5	26	0.1672	0.02
Leptodesmis sp. A121	LXYR00000000	Phormidesmis_priestleyi_BC1401	21.5	0.204	0

## Sheet: Supplementary Table 4
Supplementary Table 4 Patristic distance between Leptodesmis sp. A121 and related strains
No.	Accession No.	Strain	1	2	3	4	5	6	7	8	9	10	11	12	13	14	15	16	17	18	19	20	21	22	23	24	25	26	27	28	29	30	31	32	33	34
1	CP001344	Cyanothece_sp._PCC7425		0.33	0.31	0.31	0.3	0.3	0.3	0.32	0.32	0.32	0.32	0.32	0.31	0.32	0.33	0.32	0.32	0.31	0.32	0.33	0.33	0.33	0.33	0.34	0.33	0.32	0.34	0.34	0.35	0.33	0.35	0.34	0.33	0.33
2	CP018092	Synechococcus_lividus_PCC6715	0.33		0.35	0.35	0.34	0.34	0.34	0.36	0.36	0.36	0.35	0.35	0.35	0.35	0.36	0.36	0.35	0.35	0.36	0.37	0.37	0.37	0.36	0.37	0.36	0.35	0.38	0.38	0.39	0.36	0.39	0.37	0.37	0.37
3	JJML01000000	Neosynechococcus sphagnicola_sy1	0.31	0.35		0.3	0.29	0.29	0.29	0.31	0.31	0.31	0.31	0.31	0.3	0.3	0.31	0.31	0.31	0.3	0.31	0.32	0.32	0.32	0.32	0.33	0.32	0.31	0.33	0.33	0.34	0.32	0.34	0.32	0.32	0.32
4	AP017367	Leptolyngbya sp. O-77	0.31	0.35	0.3		0.07	0.08	0.08	0.27	0.27	0.27	0.26	0.26	0.26	0.26	0.29	0.28	0.28	0.28	0.29	0.29	0.3	0.29	0.29	0.3	0.29	0.29	0.32	0.32	0.33	0.3	0.32	0.31	0.31	0.31
5	DVEA01000000	Thermoleptolyngbya_sp._M55_K2018_002	0.3	0.34	0.29	0.07		0.02	0.02	0.26	0.26	0.26	0.26	0.26	0.25	0.25	0.28	0.28	0.27	0.27	0.28	0.29	0.29	0.28	0.28	0.29	0.28	0.28	0.31	0.31	0.32	0.29	0.31	0.3	0.3	0.3
6	CP053661	Thermoleptolyngbya sp._PKUAC-SCTA183	0.3	0.34	0.29	0.08	0.02		0	0.26	0.26	0.26	0.26	0.26	0.26	0.26	0.28	0.28	0.27	0.27	0.28	0.29	0.29	0.29	0.29	0.3	0.29	0.28	0.31	0.31	0.32	0.29	0.32	0.3	0.3	0.3
7	CP070366	Thermoleptolyngbya sp._PKUAC-SCTB121	0.3	0.34	0.29	0.08	0.02	0		0.26	0.26	0.26	0.26	0.26	0.26	0.26	0.28	0.28	0.27	0.27	0.28	0.29	0.29	0.29	0.29	0.3	0.29	0.28	0.31	0.31	0.32	0.3	0.32	0.3	0.3	0.3
8	JAAUTN010000000	Leptolyngbyaceae cyanobacterium SM1_4_3	0.32	0.36	0.31	0.27	0.26	0.26	0.26		0.13	0.28	0.27	0.27	0.27	0.27	0.3	0.3	0.29	0.29	0.3	0.31	0.31	0.31	0.31	0.32	0.31	0.3	0.33	0.33	0.34	0.32	0.34	0.32	0.32	0.32
9	JACJPJ010000000	Oculatella_sp._FACHB-28	0.32	0.36	0.31	0.27	0.26	0.26	0.26	0.13		0.28	0.27	0.27	0.27	0.27	0.3	0.3	0.29	0.29	0.3	0.31	0.31	0.31	0.31	0.31	0.31	0.3	0.33	0.33	0.34	0.31	0.34	0.32	0.32	0.32
10	JACXWX010000000	Phormidium_tenue_FACHB-887	0.32	0.36	0.31	0.27	0.26	0.26	0.26	0.28	0.28		0.25	0.25	0.25	0.25	0.3	0.3	0.29	0.29	0.3	0.31	0.31	0.3	0.3	0.31	0.3	0.3	0.33	0.33	0.34	0.31	0.33	0.32	0.32	0.32
11	NKFP01000000	Leptolyngbya_ohadii_IS1	0.32	0.35	0.31	0.26	0.26	0.26	0.26	0.27	0.27	0.25		0.24	0.24	0.24	0.3	0.29	0.29	0.29	0.29	0.3	0.3	0.3	0.3	0.31	0.3	0.3	0.32	0.32	0.33	0.31	0.33	0.32	0.31	0.31
12	KL662191	Leptolyngbya_sp._JSC-1	0.32	0.35	0.31	0.26	0.26	0.26	0.26	0.27	0.27	0.25	0.24		0.02	0.02	0.3	0.29	0.29	0.28	0.29	0.3	0.3	0.3	0.3	0.31	0.3	0.3	0.32	0.32	0.33	0.31	0.33	0.32	0.31	0.31
13	JACYLO010000000	Elainella_sp._C42_A2020_010	0.31	0.35	0.3	0.26	0.25	0.26	0.26	0.27	0.27	0.25	0.24	0.02		0	0.3	0.29	0.29	0.28	0.29	0.3	0.3	0.3	0.3	0.31	0.3	0.3	0.32	0.32	0.33	0.31	0.33	0.31	0.31	0.31
14	RHGL01000000	Leptolyngbya_sp._IPPAS_B-1204_Mongol_c46	0.32	0.35	0.3	0.26	0.25	0.26	0.26	0.27	0.27	0.25	0.24	0.02	0		0.3	0.29	0.29	0.28	0.29	0.3	0.3	0.3	0.3	0.31	0.3	0.3	0.32	0.32	0.33	0.31	0.33	0.31	0.31	0.31
15	PVWK01000000	Stenomitos_frigidus_ULC18	0.33	0.36	0.31	0.29	0.28	0.28	0.28	0.3	0.3	0.3	0.3	0.3	0.3	0.3		0.28	0.28	0.27	0.28	0.3	0.3	0.3	0.3	0.31	0.3	0.31	0.33	0.33	0.34	0.32	0.34	0.32	0.32	0.32
16	CP072600	Leptolyngbya sp. E412	0.32	0.36	0.31	0.28	0.28	0.28	0.28	0.3	0.3	0.3	0.29	0.29	0.29	0.29	0.28		0.26	0.26	0.27	0.3	0.3	0.3	0.3	0.3	0.3	0.3	0.33	0.33	0.33	0.31	0.33	0.32	0.32	0.32
17	VRZD01000000	Pantanalinema_sp._GBBB05NODE_46	0.32	0.35	0.31	0.28	0.27	0.27	0.27	0.29	0.29	0.29	0.29	0.29	0.29	0.29	0.28	0.26		0.24	0.25	0.29	0.29	0.29	0.29	0.3	0.29	0.3	0.32	0.32	0.33	0.31	0.33	0.32	0.31	0.31
18	CP075171	Leptodesmis_sp._A121	0.31	0.35	0.3	0.28	0.27	0.27	0.27	0.29	0.29	0.29	0.29	0.28	0.28	0.28	0.27	0.26	0.24		0.24	0.29	0.29	0.29	0.29	0.3	0.29	0.29	0.32	0.32	0.33	0.31	0.33	0.31	0.31	0.31
19	JAAUSG010000000	Leptolyngbyaceae_cyanobacterium_	0.32	0.36	0.31	0.29	0.28	0.28	0.28	0.3	0.3	0.3	0.29	0.29	0.29	0.29	0.28	0.27	0.25	0.24		0.3	0.3	0.3	0.3	0.31	0.3	0.3	0.33	0.33	0.34	0.31	0.34	0.32	0.32	0.32
20	JACJRC010000000	Alkalinema sp. FACHB-956	0.33	0.37	0.32	0.29	0.29	0.29	0.29	0.31	0.31	0.31	0.3	0.3	0.3	0.3	0.3	0.3	0.29	0.29	0.3		0.07	0.29	0.29	0.3	0.29	0.31	0.34	0.34	0.35	0.32	0.34	0.33	0.33	0.33
21	MUGG01000000	Alkalinema sp. CACIAM 70d	0.33	0.37	0.32	0.3	0.29	0.29	0.29	0.31	0.31	0.31	0.3	0.3	0.3	0.3	0.3	0.3	0.29	0.29	0.3	0.07		0.29	0.29	0.3	0.29	0.31	0.34	0.34	0.35	0.32	0.34	0.33	0.33	0.33
22	LXYR01000000	Phormidesmis_priestleyi_BC1401	0.33	0.37	0.32	0.29	0.28	0.29	0.29	0.31	0.31	0.3	0.3	0.3	0.3	0.3	0.3	0.3	0.29	0.29	0.3	0.29	0.29		0.13	0.26	0.25	0.31	0.33	0.33	0.34	0.32	0.34	0.33	0.32	0.32
23	MPPI01000000	Phormidesmis_priestleyi_ULC007	0.33	0.36	0.32	0.29	0.28	0.29	0.29	0.31	0.31	0.3	0.3	0.3	0.3	0.3	0.3	0.3	0.29	0.29	0.3	0.29	0.29	0.13		0.26	0.25	0.31	0.33	0.33	0.34	0.32	0.34	0.33	0.32	0.32
24	AP014642	Leptolyngbya boryana dg5	0.34	0.37	0.33	0.3	0.29	0.3	0.3	0.32	0.31	0.31	0.31	0.31	0.31	0.31	0.31	0.3	0.3	0.3	0.31	0.3	0.3	0.26	0.26		0.25	0.32	0.34	0.34	0.35	0.33	0.35	0.34	0.33	0.33
25	WVIE01000000	Myxacorys_almedinensis_A	0.33	0.36	0.32	0.29	0.28	0.29	0.29	0.31	0.31	0.3	0.3	0.3	0.3	0.3	0.3	0.3	0.29	0.29	0.3	0.29	0.29	0.25	0.25	0.25		0.31	0.33	0.33	0.34	0.32	0.34	0.33	0.32	0.32
26	RECH01000000	Leptolyngbya sp. DLM2Bin15	0.32	0.35	0.31	0.29	0.28	0.28	0.28	0.3	0.3	0.3	0.3	0.3	0.3	0.3	0.31	0.3	0.3	0.29	0.3	0.31	0.31	0.31	0.31	0.32	0.31		0.32	0.32	0.33	0.3	0.32	0.31	0.31	0.31
27	JTHE02000000	Lyngbya_confervoides_BDU141951	0.34	0.38	0.33	0.32	0.31	0.31	0.31	0.33	0.33	0.33	0.32	0.32	0.32	0.32	0.33	0.33	0.32	0.32	0.33	0.34	0.34	0.33	0.33	0.34	0.33	0.32		0	0.31	0.28	0.3	0.29	0.29	0.29
28	QVFV01000000	Halomicronema_excentricum_str._Lakshadweep	0.34	0.38	0.33	0.32	0.31	0.31	0.31	0.33	0.33	0.33	0.32	0.32	0.32	0.32	0.33	0.33	0.32	0.32	0.33	0.34	0.34	0.33	0.33	0.34	0.33	0.32	0		0.31	0.28	0.3	0.29	0.29	0.29
29	CP021983	Halomicronema_hongdechloris_C2206	0.35	0.39	0.34	0.33	0.32	0.32	0.32	0.34	0.34	0.34	0.33	0.33	0.33	0.33	0.34	0.33	0.33	0.33	0.34	0.35	0.35	0.34	0.34	0.35	0.34	0.33	0.31	0.31		0.27	0.29	0.28	0.27	0.27
30	CP046155	Leptolyngbya sp._BL0902	0.33	0.36	0.32	0.3	0.29	0.29	0.3	0.32	0.31	0.31	0.31	0.31	0.31	0.31	0.32	0.31	0.31	0.31	0.31	0.32	0.32	0.32	0.32	0.33	0.32	0.3	0.28	0.28	0.27		0.22	0.21	0.2	0.2
31	REBM01000000	Halomicronema_excentricum_str._Lakshadweep	0.35	0.39	0.34	0.32	0.31	0.32	0.32	0.34	0.34	0.33	0.33	0.33	0.33	0.33	0.34	0.33	0.33	0.33	0.34	0.34	0.34	0.34	0.34	0.35	0.34	0.32	0.3	0.3	0.29	0.22		0.22	0.21	0.21
32	JACJOF010000000	Nodosilinea sp. FACHB-131	0.34	0.37	0.32	0.31	0.3	0.3	0.3	0.32	0.32	0.32	0.32	0.32	0.31	0.31	0.32	0.32	0.32	0.31	0.32	0.33	0.33	0.33	0.33	0.34	0.33	0.31	0.29	0.29	0.28	0.21	0.22		0.08	0.08
33	JACJQN010000000	Leptolyngbyaceae cyanobacterium SM1_4_3	0.33	0.37	0.32	0.31	0.3	0.3	0.3	0.32	0.32	0.32	0.31	0.31	0.31	0.31	0.32	0.32	0.31	0.31	0.32	0.33	0.33	0.32	0.32	0.33	0.32	0.31	0.29	0.29	0.27	0.2	0.21	0.08		0
34	MRCG01000000	Phormidium_tenue_NIES-30	0.33	0.37	0.32	0.31	0.3	0.3	0.3	0.32	0.32	0.32	0.31	0.31	0.31	0.31	0.32	0.32	0.31	0.31	0.32	0.33	0.33	0.32	0.32	0.33	0.32	0.31	0.29	0.29	0.27	0.2	0.21	0.08	0
